# Supplementary material for: Eukaryotic SNARE VAMP3 Dynamically Interacts with Multiple Chlamydial Inclusion Membrane Proteins
Source: PubMed Central journal article supplement (PMC7822134; doi:10.1128/iai.00409-20), 2021-01-19
Supplement: supp_data_source_IAI.00409-20.pdf [file supp_data_source_IAI.00409-20.pdf]

1 SUPPLEMENTAL MATERIAL

| <b>Supplemental Table 1. Primers used in this study</b>                           |                                                                                           |
|-----------------------------------------------------------------------------------|-------------------------------------------------------------------------------------------|
| Primer Sequence (5'-3')                                                           | Purpose                                                                                   |
| <b><u>pBOMB4-Tet</u></b>                                                          |                                                                                           |
| aaagaggagaaaggatctgcTTGACGATACC<br>TCCTTTAAAAC                                    | Cloning CT179 into pBOMB4-Tet 5' EagI site                                                |
| tttgaatggtcgaccggtact <b>facttatcgtcgtcatcct<br/>tgtagtc</b> ACCTTTGGGAGAAGTATTTG | Cloning CT179 into pBOMB4-Tet 3' KpnI site (with FLAG sequence in bold)                   |
| AGATCCTTTCTCCTCTTTAGATC                                                           | Creating linear vector pBOMB4-Tet 3' site                                                 |
| <b>GACTACAAGGATGACGACGATAAGT<br/>AACTGCAGGTACCGGTCGACCA</b>                       | Creating linear vector pBOMB4-Tet 5'site (with a C terminal FLAG tag as sequence in bold) |
| ctaaagaggagaaaggatctATGACTCCAGTA<br>ACACCAG                                       | Cloning CT005 into pBOMB4-Tet with a C terminal FLAG tag 5' site                          |
| tcgtcgtcatcctttagtcTTTACGAGAGGGTT<br>TCTTC                                        | Cloning CT005 into pBOMB4-Tet with a C terminal FLAG tag 3' site                          |
| ctaaagaggagaaaggatctATGATCTGTTGT<br>GACAAAGTCTTG                                  | Cloning incG into pBOMB4-Tet with a C terminal FLAG tag 5' site                           |
| tcgtcgtcatcctttagtcGAAGGAGCGTGATC<br>GAGAAC                                       | Cloning incG into pBOMB4-Tet with a C terminal FLAG tag 3' site                           |
| aagatctaaagaggagaaaggatctATGGTGAG<br>TTTAGCATTAGGGAC                              | Cloning CT223 into pBOMB4-Tet with a C terminal FLAG tag 5' site                          |
| acttatcgtcgtcatcctttagtcCACCCGAGAG<br>CCGTAATTG                                   | Cloning CT223 into pBOMB4-Tet with a C terminal FLAG tag 3' site                          |
| gatctaaagaggagaaaggatctgcATGACAAC<br>GCCTACTCTAATC                                | Cloning incA into pBOMB4-Tet with a C terminal FLAG tag 5' site                           |
| acatattgaatggtcgaccggtacTACTTATCG<br>TCGTCATCCTTG                                 | Cloning incA into pBOMB4-Tet with a C terminal FLAG tag 3' site                           |
| aagatctaaagaggagaaaggatctATGACGTA<br>CTCTATGTCCGATATAG                            | Cloning incC into pBOMB4-Tet with a C terminal FLAG tag 5' site                           |
| acttatcgtcgtcatcctttagtcGCTTACATATA<br>AAGTTTGAGGATC                              | Cloning incC into pBOMB4-Tet with a C terminal FLAG tag 3' site                           |

|                                                           |                                                                     |
|-----------------------------------------------------------|---------------------------------------------------------------------|
| ctaaagaggagaaaggatctATGGTTCATTCT<br>GTATAACAATTC          | Cloning incB into pBOMB4-Tet with a C<br>terminal FLAG tag 5' site  |
| tcgctcgtcatcctttagtagcTTCTTGAGGTTTTGT<br>TGG              | Cloning incB into pBOMB4-Tet with a C<br>terminal FLAG tag 3' site  |
| ctaaagaggagaaaggatctATGAGCACTGTA<br>CCCGTTG               | Cloning CT442 into pBOMB4-Tet with a C<br>terminal FLAG tag 5' site |
| tcgctcgtcatcctttagtagcTTGGGTCTGATCCA<br>CCAG              | Cloning CT442 into pBOMB4-Tet with a C<br>terminal FLAG tag 3' site |
| ctaaagaggagaaaggatctATGAAATTACCA<br>GAAGTGAGTTTTAG        | Cloning CT449 into pBOMB4-Tet with a C<br>terminal FLAG tag 5' site |
| tcgctcgtcatcctttagtagcCTGAATAGGCGCTT<br>CAGAAG            | Cloning CT449 into pBOMB4-Tet with a C<br>terminal FLAG tag 3' site |
| aagatctaaagaggagaaaggatctATGCGTTG<br>CTGTTGTGTTCC         | Cloning CT222 into pBOMB4-Tet with a C<br>terminal FLAG tag 5' site |
| acttatcgtcgtcatcctttagtagcGTGGAATACAC<br>TAATTGCTTTTAATTC | Cloning CT222 into pBOMB4-Tet with a C<br>terminal FLAG tag 3' site |
| gatctaaagaggagaaaggatctgcATGACTAC<br>TCTTCCCAATACTTG      | Cloning CT813 into pBOMB4-Tet with a C<br>terminal FLAG tag 5' site |
| acatattgaaatggtcgaccggtacttaCTTATCGT<br>CGTCATCCTTGTAG    | Cloning CT813 into pBOMB4-Tet with a C<br>terminal FLAG tag 3' site |
| <b><u>pSU</u></b>                                         |                                                                     |
| gctgatcctccgtcactgcaggtacATGGGAGAC<br>GTGATGATAC          | Cloning incA 3' fragment flanking into<br>pSU at KpnI site          |
| ctagagaataggaactcccTAGTCTTAGGAG<br>CTTTTTGC               | Cloning incA 3' fragment flanking into<br>pSU at KpnI site          |
| ttctctagaaagtataggaactccAGGCACTTTC<br>TCATTTAAAG          | Cloning incA 5' fragment flanking into<br>pSU at NcoI site          |
| tatcagcaataaaccagccagccgcCTACTTAG<br>CACCATGTTCC          | Cloning incA 5' fragment flanking into<br>pSU at NcoI site          |
| <b><u>pST25</u></b>                                       |                                                                     |
| gggGGATCCaATGTCTACAGGTCCAAC<br>TGCTG                      | Cloning VAMP3 into pST25 5' BamHI site                              |

|                                                      |                                              |
|------------------------------------------------------|----------------------------------------------|
| gggggGAATTCtATGAAGAGACAACCC<br>ACAC                  | Cloning VAMP3 into pST25 3' EcoRI site       |
| gggGGATCCaatgcctccaagttaag                           | Cloning VAMP4 into pST25 5' BamHI site       |
| gggggGAATTCcaagtacggtatttcatg                        | Cloning VAMP4 into pST25 3' EcoRI site       |
| gggggGAATTCctccaccacattgccttcg                       | Cloning VAMP4 into pST25 3' EcoRI site       |
| <b><u>pUT18C</u></b>                                 |                                              |
| gggGGATCCaatgtccatggaggacccc                         | Cloning Syntaxin 6 into pUT18C 5' BamHI site |
| gggggGAATTCttctggcgccgatcac                          | Cloning Syntaxin 6 into pUT18C 3' EcoRI site |
| gggggGAATTCcacagcactaggaagagg                        | Cloning Syntaxin 6 into pUT18C 3' EcoRI site |
| aacgccactgcaggtcgactAATATAGGAAAG<br>ATTTGTAAAAAAACTG | Cloning CT616 into pUT18C 5' Xbal site       |
| gctcggtagccggggatcctATGCAGTATGTGA<br>TGGGAAG         | Cloning CT616 into pUT18C 3' Xbal site       |
| AACGCCACTGCAGGTGCGACTATGGTC<br>AAAGCCGCTCATC         | Cloning CT324 into pUT18C 5' Xbal site       |
| GCTCGGTACCCGGGGATCCTTTATTG<br>TTCAATAACTCGTGTTGG     | Cloning CT324 into pUT18C 3' Xbal site       |
| aacgccactgcaggtcgactTTTTTTACGACG<br>GGATGC           | Cloning CT229 into pUT18C 5' Xbal site       |
| gctcggtagccggggatcctATGAGCTGTTCTA<br>ATGTTAATTC      | Cloning CT229 into pUT18C 3' Xbal site       |
| aacgccactgcaggtcgactATGCGTTGCTGT<br>TGTGTTTC         | Cloning CT222 into pUT18C 5' Xbal site       |
| gctcggtagccggggatcctTCAGTGGAATACA<br>CTAATTGC        | Cloning CT222 into pUT18C 3' Xbal site       |
| aacgccactgcaggtcgactATGAGTTTTGTT<br>GGAGATAG         | Cloning CT224 into pUT18C 5' Xbal site       |
| gctcggtagccggggatcctCTAATCATTGGGA<br>AAAATTGAG       | Cloning CT224 into pUT18C 3' Xbal site       |

|                                                          |                                        |
|----------------------------------------------------------|----------------------------------------|
| aacgccactgcaggtcgactGTGGCTAACAACTCCTTTATTC               | Cloning CT225 into pUT18C 5' Xbal site |
| gctcggtagccggggatcctTTAATCCCACCCATGAAATTTAG              | Cloning CT225 into pUT18C 3' Xbal site |
| aacgccactgcaggtcgactATGGGATTCGGA<br>ACTGTG               | Cloning CT850 into pUT18C 5' Xbal site |
| gctcggtagccggggatcctTTACCGATTCTGG<br>TTGTG               | Cloning CT850 into pUT18C 3' Xbal site |
| aacgccactgcaggtcgactATGTCTTATCTTT<br>TTTGTTCCCTC         | Cloning CT227 into pUT18C 5' Xbal site |
| gctcggtagccggggatcctTCATGAGACACTT<br>ATAGTCAC            | Cloning CT227 into pUT18C 3' Xbal site |
| aacgccactgcaggtcgactATGACTCCAGTA<br>ACACCAG              | Cloning CT005 into pUT18C 5' Xbal site |
| gctcggtagccggggatcctTTATTTACGAGAG<br>GGTTTCTTC           | Cloning CT005 into pUT18C 3' Xbal site |
| aacgccactgcaggtcgactATGGCTTGTTGC<br>GCATGTG              | Cloning CT134 into pUT18C 5' Xbal site |
| gctcggtagccggggatcctTTAGACCATCACG<br>ATCTTTAGCTC         | Cloning CT134 into pUT18C 3' Xbal site |
| aacgccactgcaggtcgactATGGTAAGCTTC<br>GATTTAAATG           | Cloning CT135 into pUT18C 5' Xbal site |
| gctcggtagccggggatcctTACTCTATACGC<br>GCATC                | Cloning CT135 into pUT18C 3' Xbal site |
| aacgccactgcaggtcgactATGACGATACCT<br>CCTTTAAAC            | Cloning CT179 into pUT18C 5' Xbal site |
| gctcggtagccggggatcctCTAACCTTTGGGA<br>GAAGTATTTG          | Cloning CT179 into pUT18C 3' Xbal site |
| aacgccactgcaggtcgactGTGCAATCGGTT<br>GGACAAG              | Cloning CT192 into pUT18C 5' Xbal site |
| gctcggtagccggggatcctTTAACAATCATTTG<br>GAAACTAAATCATTAATC | Cloning CT192 into pUT18C 3' Xbal site |



|                                                      |                                        |
|------------------------------------------------------|----------------------------------------|
| aacgccactgcaggtcgactATGGTTCATTCT<br>GTATACAATTC      | Cloning incB into pUT18C 5' Xbal site  |
| gctcggtagccggggatcctCTATTCTTGAGGT<br>TTTGTTG         | Cloning incB into pUT18C 3' Xbal site  |
| aacgccactgcaggtcgactATGCAACTTCCG<br>TCTATTATTC       | Cloning CT345 into pUT18C 5' Xbal site |
| gctcggtagccggggatcctCTAATGAGCTGCT<br>TTTCC           | Cloning CT345 into pUT18C 3' Xbal site |
| aacgccactgcaggtcgactATGTTCCGGATCT<br>ATCCCTTGTTATCCC | Cloning CT383 into pUT18C 5' Xbal site |
| gctcggtagccggggatcctCTAGTGGCCGCG<br>CTGGTT           | Cloning CT383 into pUT18C 3' Xbal site |
| aacgccactgcaggtcgactATGAGCACTGTA<br>CCCGTTG          | Cloning CT442 into pUT18C 5' Xbal site |
| gctcggtagccggggatcctTCATTGGGTCTGA<br>TCCAC           | Cloning CT442 into pUT18C 3' Xbal site |
| aacgccactgcaggtcgactATGAAATTACCA<br>GAAGTGAG         | Cloning CT449 into pUT18C 5' Xbal site |
| gctcggtagccggggatcctTACTGAATAGGC<br>GCTTC            | Cloning CT449 into pUT18C 3' Xbal site |
| aacgccactgcaggtcgactATGCCCTCCACT<br>GTTGCAC          | Cloning CT006 into pUT18C 5' Xbal site |
| gctcggtagccggggatcctTTAAGCGGAAAA<br>GCGTTGGG         | Cloning CT006 into pUT18C 3' Xbal site |
| aacgccactgcaggtcgactGTGAGAAATGAG<br>ATCTGGC          | Cloning incD into pUT18C 5' Xbal site  |
| gctcggtagccggggatcctTTAGCTCGCCCC<br>TTTTTTAC         | Cloning incD into pUT18C 3' Xbal site  |
| aacgccactgcaggtcgactATGGGAGACGTG<br>ATGATAC          | Cloning incF into pUT18C 5' Xbal site  |
| gctcggtagccggggatcctCTAGCACTTATTT<br>GTAGAAGC        | Cloning incF into pUT18C 3' Xbal site  |

|                                                |                                                                               |
|------------------------------------------------|-------------------------------------------------------------------------------|
| aacgccactgcaggtcgactATGATCTGTTGT<br>GACAAAG    | Cloning incG into pUT18C 5' Xbal site                                         |
| gctcggtagccggggatcctTTAGAAGGAGCG<br>TGATCG     | Cloning incG into pUT18C 3' Xbal site                                         |
| <b><u>pCMV7.1</u></b>                          |                                                                               |
| ccacggctcaggaATGTCTACAGGTCCAAC<br>TG           | Creating pCMV7.1-6xHis-VAMP3 with a<br>N terminal 6xHis tag 5' site           |
| tgatggtgatgatgCATGGTTAATTCTGACG<br>G           | Creating pCMV7.1-6xHis-VAMP3 with a<br>N terminal 6xHis tag 3' site           |
| ccacggctcaggaATGCCTCCAAGTTTAA<br>G             | Creating pCMV7.1-6xHis-VAMP4 with a<br>N terminal 6xHis tag 5' site           |
| tgatggtgatgatgCATGGTTAATTCTGACG<br>G           | Creating pCMV7.1-6xHis-VAMP4 with a<br>N terminal 6xHis tag 3' site           |
| tcaccatcaccactagTGGCATCCCTGTGAC<br>CCC         | Creating pCMV7.1-6xHis with a C<br>terminal 6xHis tag 5' EcoRI site           |
| tgatgtcgatgaattcGGTTAATTCTGACGGT<br>TCACTAAACG | Creating pCMV7.1-6xHis with a C<br>terminal 6xHis tag 3' EcoRI site           |
| tgaaccgtcagaattaaccgATGACTCCAGTA<br>ACACCAG    | Cloning CT005 into pCMV7.1-6xHis with<br>a C terminal 6xHis tag 5' EcoRI site |
| tgatggtgatgatgtcgatgTTTACGAGAGGGT<br>TTCTTC    | Cloning CT005 into pCMV7.1-6xHis with<br>a C terminal 6xHis tag 3' EcoRI site |
| tgaaccgtcagaattaaccgATGACTACTCTTC<br>CCAATAC   | Cloning CT813 into pCMV7.1-6xHis with<br>a C terminal 6xHis tag 5' EcoRI site |
| tgatggtgatgatgtcgatgTATCGAACCACGT<br>CTTCC     | Cloning CT813 into pCMV7.1-6xHis with<br>a C terminal 6xHis tag 3' EcoRI site |
| tgaaccgtcagaattaaccgATGCCCTCCACT<br>GTTGCAC    | Cloning CT006 into pCMV7.1-6xHis with<br>a C terminal 6xHis tag 5' EcoRI site |
| tgatggtgatgatgtcgatgAGCGGAAAAGCGT<br>TGGAAG    | Cloning CT006 into pCMV7.1-6xHis with<br>a C terminal 6xHis tag 3' EcoRI site |
| tgaaccgtcagaattaaccgATGGGAGACGTG<br>ATGATAC    | Cloning incF into pCMV7.1-6xHis with a<br>C terminal 6xHis tag 5' EcoRI site  |
| tgatggtgatgatgtcgatgGCACTTATTTGTAG<br>AAGCG    | Cloning incF into pCMV7.1-6xHis with a<br>C terminal 6xHis tag 3' EcoRI site  |

|                                                       |                                                                               |
|-------------------------------------------------------|-------------------------------------------------------------------------------|
| tgaaccgtcagaattaaccgATGATCTGTTGTG<br>ACAAAGTCTTG      | Cloning incG into pCMV7.1-6xHis with a<br>C terminal 6xHis tag 5' EcoRI site  |
| tgatggtgatgatgtcgatgGAAGGAGCGTGAT<br>CGAGAAC          | Cloning incG into pCMV7.1-6xHis with a<br>C terminal 6xHis tag 3' EcoRI site  |
| tgaaccgtcagaattaaccgATGACGATACCT<br>CCTTTAAAAC        | Cloning CT179 into pCMV7.1-6xHis with<br>a C terminal 6xHis tag 5' EcoRI site |
| tgatggtgatgatgtcgatgACCTTTGGGAGAA<br>GTATTTG          | Cloning CT179 into pCMV7.1-6xHis with<br>a C terminal 6xHis tag 3' EcoRI site |
| tgaaccgtcagaattaaccgATGGTTCATTCTG<br>TATACAATTC       | Cloning incB into pCMV7.1-6xHis with a<br>C terminal 6xHis tag 5' EcoRI site  |
| tgatggtgatgatgtcgatgTTCTTGAGGTTTTG<br>TTGG            | Cloning incB into pCMV7.1-6xHis with a<br>C terminal 6xHis tag 3' EcoRI site  |
| tgaaccgtcagaattaaccgATGAGCACTGTA<br>CCCGTTG           | Cloning CT442 into pCMV7.1-6xHis with<br>a C terminal 6xHis tag 5' EcoRI site |
| tgatggtgatgatgtcgatgTTGGGTCTGATCC<br>ACCAG            | Cloning CT442 into pCMV7.1-6xHis with<br>a C terminal 6xHis tag 3' EcoRI site |
| tgaaccgtcagaattaaccgATGAAATTACCAG<br>AAGTGAGTTTTAG    | Cloning CT449 into pCMV7.1-6xHis with<br>a C terminal 6xHis tag 5' EcoRI site |
| tgatggtgatgatgtcgatgCTGAATAGGCGCT<br>TCAGAAG          | Cloning CT449 into pCMV7.1-6xHis with<br>a C terminal 6xHis tag 3' EcoRI site |
| tgaaccgtcagaattaaccgATGCGTTGCTGT<br>TGTGTTC           | Cloning CT222 into pCMV7.1-6xHis with<br>a C terminal 6xHis tag 5' EcoRI site |
| tgatggtgatgatgtcgatgGTGGAATACACTA<br>ATTGCTTTTAATTC   | Cloning CT222 into pCMV7.1-6xHis with<br>a C terminal 6xHis tag 3' EcoRI site |
| tgaaccgtcagaattaaccgATGGTGAGTTTA<br>GCATTAGGGAC       | Cloning CT223 into pCMV7.1-6xHis with<br>a C terminal 6xHis tag 5' EcoRI site |
| tgatggtgatgatgtcgatgCACCCGAGAGCCG<br>TAATTG           | Cloning CT223 into pCMV7.1-6xHis with<br>a C terminal 6xHis tag 3' EcoRI site |
| tgaaccgtcagaattaaccgTTGCGAAATAGA<br>GGCGCC            | Cloning CT449 into pCMV7.1-6xHis with<br>a C terminal 6xHis tag 5' EcoRI site |
| tgatggtgatgatgtcgatgTCTCAGACTTTCTT<br>CCAATACACATTTTC | Cloning CT449 into pCMV7.1-6xHis with<br>a C terminal 6xHis tag 3' EcoRI site |

|                                                                                                                                       |                                                                               |
|---------------------------------------------------------------------------------------------------------------------------------------|-------------------------------------------------------------------------------|
| tgaaccgtcagaattaaccgTTGATGGACAAA<br>ATTAAGAAAATAG                                                                                     | Cloning CT449 into pCMV7.1-6xHis with<br>a C terminal 6xHis tag 5' EcoRI site |
| tgatggtgatgatgtcgatgGGAGCTTTTTGTA<br>GAGGG                                                                                            | Cloning CT449 into pCMV7.1-6xHis with<br>a C terminal 6xHis tag 3' EcoRI site |
| tgaaccgtcagaattaaccgATGACGTA CTCTA<br>TGTCCGATATAG                                                                                    | Cloning CT449 into pCMV7.1-6xHis with<br>a C terminal 6xHis tag 5' EcoRI site |
| tgatggtgatgatgtcgatgGCTTACATATAAAG<br>TTTGAGGATC                                                                                      | Cloning CT449 into pCMV7.1-6xHis with<br>a C terminal 6xHis tag 3' EcoRI site |
| <b>Supplemental Table 1. Primers used in this study</b>                                                                               |                                                                               |
| Lower case letters indicate vector sequence, and upper-case letters indicate the<br>sequence of the gene to be cloned into the vector |                                                                               |

2

| <b>Supplemental Table 2. Antibodies used in this study</b>                                   |            |                          |                       |
|----------------------------------------------------------------------------------------------|------------|--------------------------|-----------------------|
| <b>Name</b>                                                                                  | <b>Use</b> | <b>Source</b>            | <b>Catalog Number</b> |
| Cellubrevin (VAMP3) Rabbit polyclonal antibody                                               | IFA        | Synaptic Systems         | 104 103               |
| VAMP3 Polyclonal Antibody                                                                    | WB         | Thermo Fisher Scientific | PA1-767A              |
| VAMP 4                                                                                       | WB         | Synaptic Systems         | 136 002               |
| Anti-Glyceraldehyde-3-Phosphate Dehydrogenase Antibody (GAPDH), clone 6C5, produced in Mouse | WB         | Sigma-Aldrich            | MAB374                |
| Anti-VAMP4 antibody produced in rabbit                                                       | IFA        | Sigma                    | HPA050418-100UL       |
| Giantin monoclonal antibody (G1/133)                                                         | IFA        | Enzo Life Sciences       | ALX-804-600-C100      |
| Chlamydia trachomatis (MOMP)                                                                 | IFA        | Meridian Life Sciences   | B65266G               |
| THE™ His Tag Antibody, mAb, Mouse                                                            | WB         | Genscript                | A00186                |
| ANTI-FLAG® antibody produced in rabbit                                                       | WB         | Sigma                    | F7425-.2MG            |
| DRAQ5™ Fluorescent Probe Solution                                                            | IFA        | ThermoFisher Scientific  | 62251                 |
| Anti-full length IncA L2, produced in sheep                                                  | IFA        | Serum Diagnostica GmbH   | Rucks/Ouellette Lab   |
| Guinea Pig anti-Chlamydia trachomatis L2                                                     | IFA        | Rocky Mountain Labs      |                       |
| Mouse anti-CT223                                                                             | IFA        | Rocky Mountain Labs      |                       |
| Rabbit anti-CT813                                                                            | IFA        | Rocky Mountain Labs      |                       |
| Rabbit anti-IncE                                                                             | IFA        | Rocky Mountain Labs      |                       |

3 IFA = immunofluorescence

4 WB = western blotting

5 Supplemental Table 3 – Quantification of VAMP3 inclusion localization to WT Ctr L2  
6 and *inc* mutant strains at 30hpi.

| Intensity of VAMP3 inclusion localization during infection with WT Ctr L2 (30hpi) |       |           |          |                                            |
|-----------------------------------------------------------------------------------|-------|-----------|----------|--------------------------------------------|
| Image ID                                                                          | Area  | RawIntDen | Gain (V) | (RawIntDen/Area)*(Gain/Normalization Gain) |
| 01_WTL2_30hpi_-BFA_VAMP3_63x                                                      | 3.115 | 209996    | 741      | 68243.31237                                |
|                                                                                   | 2.182 | 156414    | 741      | 72565.13426                                |
|                                                                                   | 3.341 | 181024    | 708      | 52406.10203                                |
| 02_WTL2_30hpi_-BFA_VAMP3_63x                                                      | 2.686 | 146911    | 708      | 52901.80413                                |
|                                                                                   | 2.236 | 103930    | 708      | 44956.37702                                |
|                                                                                   | 3.973 | 229831    | 708      | 55951.56239                                |
| 04_WTL2_30hpi_-BFA_VAMP3_63x                                                      | 2.113 | 81269     | 708      | 37200.39878                                |
|                                                                                   | 3.188 | 119665    | 708      | 36305.38186                                |
|                                                                                   | 2.152 | 29264     | 708      | 13152.66013                                |
| 05_WTL2_30hpi_-BFA_VAMP3_63x                                                      | 2.279 | 98652     | 708      | 41868.14752                                |
|                                                                                   | 2.945 | 77731     | 708      | 25528.843                                  |
|                                                                                   | 5.325 | 154113    | 708      | 27992.50981                                |
| 06_WTL2_30hpi_-BFA_VAMP3_63x                                                      | 2.646 | 122870    | 708      | 44913.63394                                |
|                                                                                   | 3.25  | 195704    | 708      | 58242.30013                                |
|                                                                                   | 5.376 | 258646    | 708      | 46533.81757                                |
|                                                                                   | 2.643 | 141830    | 708      | 51903.07834                                |
| 01_WTL2_30hpi_+BFA_VAMP3_63x                                                      | 1.671 | 91722     | 732      | 54890.48474                                |
|                                                                                   | 1.642 | 68161     | 732      | 41510.96224                                |
|                                                                                   | 3.011 | 41895     | 732      | 13913.98207                                |
| 02_WTL2_30hpi_+BFA_VAMP3_63x                                                      | 2.094 | 108450    | 732      | 51790.83095                                |
|                                                                                   | 2.707 | 73807     | 732      | 27265.23827                                |
| 03_WTL2_30hpi_+BFA_VAMP3_63x                                                      | 4.623 | 269798    | 750      | 59795.01991                                |
| 04_WTL2_30hpi_+BFA_VAMP3_63x                                                      | 1.25  | 93962     | 750      | 77018.03279                                |
|                                                                                   | 2.02  | 62928     | 750      | 31918.51972                                |
|                                                                                   | 1.361 | 65306     | 750      | 49163.76579                                |
| 05_WTL2_30hpi_+BFA_VAMP3_63x                                                      | 1.288 | 352022    | 750      | 280029.7195                                |
|                                                                                   | 2.404 | 165416    | 750      | 70500.66829                                |
| 06_WTL2_30hpi_+BFA_VAMP3_63x                                                      | 1.419 | 190802    | 750      | 137768.7473                                |
|                                                                                   | 3.275 | 199079    | 750      | 62282.25504                                |
|                                                                                   | 2.98  | 81554     | 750      | 28040.07592                                |
| 07_WTL2_30hpi_+BFA_VAMP3_63x                                                      | 1.984 | 126975    | 750      | 65573.25407                                |
|                                                                                   | 2.274 | 66860     | 750      | 30124.93332                                |
|                                                                                   | 3.113 | 156267    | 750      | 51432.58309                                |
|                                                                                   | 2.412 | 174315    | 750      | 74047.0292                                 |
|                                                                                   | 1.247 | 312671    | 750      | 256904.2752                                |
| 01_WTL2_30hpi_+BFA_VAMP3_63x                                                      | 2.66  | 262870    | 750      | 101253.3896                                |
|                                                                                   | 2.024 | 95012     | 732      | 46942.68775                                |
|                                                                                   | 1.329 | 74556     | 732      | 56099.3228                                 |
| 02_WTL2_30hpi_+BFA_VAMP3_63x                                                      | 1.898 | 70586     | 732      | 37189.67334                                |
|                                                                                   | 2.316 | 85091     | 732      | 36740.50086                                |
|                                                                                   | 1.373 | 46833     | 732      | 34109.97815                                |
| 03_WTL2_30hpi_+BFA_VAMP3_63x                                                      | 0.706 | 29803     | 732      | 42213.88102                                |
|                                                                                   | 0.955 | 65887     | 732      | 68991.62304                                |
|                                                                                   | 1.234 | 58941     | 732      | 47764.18152                                |
|                                                                                   | 0.644 | 35380     | 732      | 54937.8882                                 |
|                                                                                   | 1.491 | 48597     | 732      | 32593.56137                                |
| 04_WTL2_30hpi_+BFA_VAMP3_63x                                                      | 1.78  | 73162     | 732      | 41102.24719                                |
|                                                                                   | 1.079 | 34099     | 732      | 31602.40964                                |
|                                                                                   | 1.918 | 104536    | 732      | 54502.60688                                |
|                                                                                   |       |           |          |                                            |

|                              |       |        |     |             |
|------------------------------|-------|--------|-----|-------------|
| 04_WTL2_30hpi_+BFA_VAMP3_63x | 1.593 | 102801 | 732 | 64532.95669 |
|                              | 1.94  | 105163 | 732 | 54207.73196 |
|                              | 0.287 | 8309   | 732 | 28951.21951 |
|                              | 2.198 | 126525 | 732 | 57563.69427 |
|                              | 1.695 | 105680 | 732 | 62348.0826  |
|                              | 2.702 | 174189 | 732 | 64466.69134 |
|                              | 1.215 | 65281  | 732 | 53729.21811 |
| 05_WTL2_30hpi_+BFA_VAMP3_63x | 1.767 | 142580 | 732 | 80690.43577 |
|                              | 1.737 | 92225  | 732 | 53094.41566 |
|                              | 1.647 | 66641  | 732 | 40462.05222 |
|                              | 1.928 | 134386 | 732 | 69702.28216 |
| 06_WTL2_30hpi_+BFA_VAMP3_63x | 3.795 | 148185 | 732 | 39047.43083 |
|                              | 2.58  | 83831  | 732 | 32492.63566 |
|                              | 1.716 | 81972  | 732 | 47769.23077 |
|                              | 1.047 | 36505  | 732 | 34866.28462 |
|                              | 1.494 | 47047  | 732 | 31490.62918 |
|                              | 1.969 | 108005 | 732 | 54852.71712 |
| 07_WTL2_30hpi_+BFA_VAMP3_63x | 2.251 | 177580 | 732 | 78889.3825  |
|                              | 2.671 | 169894 | 732 | 63606.88881 |
|                              | 3.148 | 251077 | 732 | 79757.62389 |
| 08_WTL2_30hpi_+BFA_VAMP3_63x | 0.904 | 100899 | 732 | 111613.9381 |
|                              | 1.216 | 112388 | 732 | 92424.34211 |
|                              | 0.861 | 101959 | 732 | 118419.2799 |
|                              | 1.396 | 136525 | 732 | 97797.27794 |
| 09_WTL2_30hpi_+BFA_VAMP3_63x | 1.447 | 46849  | 732 | 32376.64133 |
|                              | 2.461 | 232149 | 732 | 94331.16619 |
|                              | 1.069 | 143169 | 732 | 133927.9701 |
|                              | 0.553 | 29705  | 732 | 53716.09403 |
| 10_WTL2_30hpi_+BFA_VAMP3_63x | 1.207 | 118318 | 732 | 98026.51201 |
|                              | 3.599 | 221389 | 732 | 61514.03168 |
|                              | 1.51  | 96589  | 732 | 63966.22517 |
|                              | 0.894 | 77753  | 732 | 86972.03579 |
|                              | 1.216 | 95872  | 732 | 78842.10526 |
| 11_WTL2_30hpi_+BFA_VAMP3_63x | 1.832 | 134137 | 732 | 73218.88646 |
|                              | 0.585 | 89621  | 732 | 153198.2906 |
|                              | 1.214 | 70697  | 732 | 58234.76112 |
|                              | 1.814 | 117510 | 732 | 64779.49283 |
|                              | 2.476 | 164376 | 732 | 66387.72213 |
| 12_WTL2_30hpi_+BFA_VAMP3_63x | 2.306 | 221570 | 732 | 96084.12836 |
|                              | 3.24  | 158775 | 732 | 49004.62963 |
|                              | 2.059 | 134849 | 732 | 65492.47207 |
|                              | 1.852 | 103511 | 732 | 55891.46868 |
| 13_WTL2_30hpi_+BFA_VAMP3_63x | 1.711 | 91960  | 732 | 53746.34717 |
|                              | 2.194 | 110824 | 732 | 50512.30629 |
| 14_WTL2_30hpi_+BFA_VAMP3_63x | 2.699 | 149622 | 732 | 55436.08744 |
|                              | 1.217 | 104381 | 732 | 85769.10435 |
|                              | 1.968 | 109408 | 732 | 55593.49593 |
|                              | 1.067 | 36427  | 732 | 34139.64386 |
|                              | 0.622 | 31070  | 732 | 49951.76849 |
| 15_WTL2_30hpi_+BFA_VAMP3_63x | 2.635 | 132613 | 732 | 50327.51423 |
|                              | 1.428 | 58991  | 732 | 41310.22409 |
|                              | 1.298 | 61033  | 732 | 47020.80123 |
|                              | 1.506 | 64786  | 732 | 43018.5923  |
| 16_WTL2_30hpi_+BFA_VAMP3_63x | 4.252 | 293402 | 732 | 69003.29257 |

|                              |       |        |     |             |
|------------------------------|-------|--------|-----|-------------|
|                              | 1.542 | 118462 | 732 | 76823.60571 |
|                              | 1.221 | 147565 | 732 | 120855.8559 |
|                              | 2.39  | 143904 | 732 | 60210.87866 |
| 17_WTL2_30hpi_+BFA_VAMP3_63x | 0.944 | 75604  | 732 | 80088.98305 |
|                              | 1.262 | 76549  | 732 | 60656.89382 |
|                              | 2.755 | 412136 | 732 | 149595.6443 |
|                              | 2.017 | 115278 | 732 | 57153.19782 |
|                              | 3.431 | 283397 | 732 | 82598.95074 |
| 18_WTL2_30hpi_+BFA_VAMP3_63x | 2.624 | 292895 | 732 | 111621.5701 |
|                              | 1.407 | 141090 | 732 | 100277.1855 |
|                              | 2.18  | 202746 | 732 | 93002.75229 |
|                              | 1.403 | 146428 | 732 | 104367.7833 |
| 19_WTL2_30hpi_+BFA_VAMP3_63x | 2.209 | 135068 | 732 | 61144.40923 |
|                              | 1.854 | 124765 | 732 | 67295.03776 |
|                              | 1.928 | 173893 | 732 | 90193.46473 |
|                              | 1.647 | 95396  | 732 | 57921.06861 |
|                              | 1.576 | 101714 | 732 | 64539.3401  |
| 20_WTL2_30hpi_+BFA_VAMP3_63x | 2.277 | 257796 | 732 | 113217.3913 |
|                              | 3.653 | 343020 | 732 | 93900.90337 |
|                              | 1.468 | 151464 | 732 | 103177.1117 |
|                              | 2.796 | 267769 | 732 | 95768.598   |
|                              | 1.213 | 193023 | 732 | 159128.6068 |
| 21_WTL2_30hpi_+BFA_VAMP3_63x | 1.755 | 129406 | 732 | 73735.61254 |
|                              | 3.103 | 441344 | 732 | 142231.389  |
|                              | 2.649 | 442260 | 732 | 166953.5674 |
| 07_WTL2_30hpi_-BFA_VAMP3_63x | 4.438 | 241402 | 732 | 54394.32177 |
|                              | 2.249 | 104299 | 732 | 46375.72254 |
| 08_WTL2_30hpi_-BFA_VAMP3_63x | 1.439 | 68435  | 732 | 47557.33148 |
|                              | 4.159 | 207825 | 732 | 49969.9447  |
|                              | 1.553 | 104402 | 732 | 67226.01417 |
| 09_WTL2_30hpi_-BFA_VAMP3_63x | 3.013 | 252529 | 732 | 83813.14305 |
|                              | 0.962 | 95180  | 732 | 98939.70894 |
|                              | 3.074 | 329689 | 732 | 107250.8133 |
|                              | 1.337 | 211249 | 732 | 158002.2438 |
|                              | 1.295 | 203564 | 732 | 157192.278  |
|                              | 1.363 | 299515 | 732 | 219746.8819 |
| 10_WTL2_30hpi_-BFA_VAMP3_63x | 1.319 | 95963  | 732 | 72754.35936 |
|                              | 1.299 | 122147 | 732 | 94031.56274 |
|                              | 3.013 | 215861 | 732 | 71643.21274 |
| 11_WTL2_30hpi_-BFA_VAMP3_63x | 1.821 | 95318  | 732 | 52343.76716 |
|                              | 2.82  | 227987 | 732 | 80846.4539  |
|                              | 1.955 | 133657 | 732 | 68366.75192 |
| 12_WTL2_30hpi_-BFA_VAMP3_63x | 2.378 | 128239 | 732 | 53927.24979 |
|                              | 2.694 | 182011 | 732 | 67561.61841 |
|                              | 3.471 | 237681 | 732 | 68476.23163 |
|                              | 2.93  | 130194 | 732 | 44434.81229 |
| 13_WTL2_30hpi_-BFA_VAMP3_63x | 2.201 | 156958 | 732 | 71312.13085 |
|                              | 0.753 | 109038 | 732 | 144804.7809 |
|                              | 1.608 | 118085 | 732 | 73435.94527 |
|                              | 1.737 | 112785 | 732 | 64930.91537 |
|                              | 2.611 | 179363 | 732 | 68695.13596 |
| 14_WTL2_30hpi_-BFA_VAMP3_63x | 2.482 | 167562 | 732 | 67510.87832 |
|                              | 2.024 | 245940 | 732 | 121511.8577 |
| 15_WTL2_30hpi_-BFA_VAMP3_63x | 0.862 | 110115 | 732 | 127743.6195 |



|                              |       |        |     |             |
|------------------------------|-------|--------|-----|-------------|
|                              | 2.428 | 244003 | 732 | 100495.4695 |
|                              | 0.532 | 87945  | 732 | 165310.1504 |
| 16_WTL2_30hpi_-BFA_VAMP3_63x | 2.531 | 223199 | 732 | 88186.09245 |
|                              | 0.682 | 73900  | 732 | 108357.7713 |
|                              | 2.608 | 225828 | 732 | 86590.4908  |
| 17_WTL2_30hpi_-BFA_VAMP3_63x | 2.127 | 203157 | 732 | 95513.39915 |
|                              | 1.019 | 112756 | 732 | 110653.5819 |
| 18_WTL2_30hpi_-BFA_VAMP3_63x | 0.675 | 45432  | 732 | 67306.66667 |
|                              | 2.46  | 199436 | 732 | 81071.54472 |
|                              | 1.019 | 59458  | 732 | 58349.36212 |
|                              | 3.707 | 237389 | 732 | 64038.03615 |
| 19_WTL2_30hpi_-BFA_VAMP3_63x | 1.168 | 74222  | 732 | 63546.23288 |
|                              | 1.967 | 160831 | 732 | 81764.61617 |
|                              | 1.659 | 100077 | 732 | 60323.68897 |
| 20_WTL2_30hpi_-BFA_VAMP3_63x | 1.593 | 89704  | 732 | 56311.36221 |
|                              | 2.127 | 124171 | 732 | 58378.46732 |
|                              | 2.366 | 69080  | 732 | 29196.95689 |
|                              | 1.704 | 103569 | 732 | 60779.92958 |

| <b>Intensity of VAMP3 inclusion localization during infection with Ctr L2 <math>\Delta</math>incA (30hpi)</b> |       |           |          |                                            |
|---------------------------------------------------------------------------------------------------------------|-------|-----------|----------|--------------------------------------------|
| Image ID                                                                                                      | Area  | RawIntDen | Gain (V) | (RawIntDen/Area)*(Gain/Normalization Gain) |
| 01_L2deltaIncA_30hpi_-BFA_VAMP3_63x                                                                           | 1.418 | 136736    | 779      | 102620.2378                                |
|                                                                                                               | 1.257 | 130424    | 779      | 110420.2216                                |
| 02_L2deltaIncA_30hpi_-BFA_VAMP3_63x                                                                           | 0.785 | 108102    | 779      | 146551.561                                 |
|                                                                                                               | 0.852 | 117975    | 779      | 147359.0347                                |
|                                                                                                               | 1.899 | 330576    | 779      | 185256.1918                                |
|                                                                                                               | 1.287 | 143959    | 779      | 119038.2821                                |
| 03_L2deltaIncA_30hpi_-BFA_VAMP3_63x                                                                           | 1.444 | 160441    | 779      | 118242.756                                 |
| 04_L2deltaIncA_30hpi_-BFA_VAMP3_63x                                                                           | 0.922 | 66583     | 779      | 76852.64423                                |
|                                                                                                               | 1.321 | 126910    | 779      | 102239.6615                                |
|                                                                                                               | 1.004 | 100784    | 779      | 106827.7927                                |
| 05_L2deltaIncA_30hpi_-BFA_VAMP3_63x                                                                           | 1.236 | 74041     | 779      | 63749.99889                                |
|                                                                                                               | 1.564 | 124867    | 779      | 84964.46078                                |
|                                                                                                               | 1.501 | 128698    | 779      | 91246.76627                                |
| 06_L2deltaIncA_30hpi_-BFA_VAMP3_63x                                                                           | 1.226 | 97307     | 779      | 84465.62302                                |
|                                                                                                               | 1.062 | 85002     | 779      | 85178.69933                                |
|                                                                                                               | 1.816 | 128876    | 779      | 75523.58212                                |
| 01_L2deltaIncA_30hpi_+BFA_VAMP3_63x                                                                           | 1.784 | 188748    | 779      | 112593.6466                                |
| 02_L2deltaIncA_30hpi_+BFA_VAMP3_63x                                                                           | 1.601 | 129554    | 779      | 86116.40095                                |
| 03_L2deltaIncA_30hpi_+BFA_VAMP3_63x                                                                           | 1.247 | 98108     | 779      | 83726.77157                                |
|                                                                                                               | 1.361 | 184232    | 779      | 144056.6523                                |
| 04_L2deltaIncA_30hpi_+BFA_VAMP3_63x                                                                           | 1.086 | 195504    | 779      | 191580.8955                                |
|                                                                                                               | 1.311 | 167751    | 779      | 136172.3093                                |
|                                                                                                               | 0.956 | 111033    | 779      | 123600.5942                                |
| 01_CtrL2deltaIncA_30hpi_-BFA_VAMP3_63x                                                                        | 0.318 | 21248     | 706      | 64444.30697                                |
|                                                                                                               | 0.338 | 42530     | 706      | 121359.0875                                |
|                                                                                                               | 0.227 | 18080     | 706      | 76818.56479                                |
|                                                                                                               | 0.337 | 22197     | 706      | 63526.94946                                |
| 02_CtrL2deltaIncA_30hpi_-BFA_VAMP3_63x                                                                        | 0.349 | 34415     | 706      | 95107.76301                                |
|                                                                                                               | 0.343 | 39883     | 706      | 112146.9117                                |
|                                                                                                               | 0.385 | 22393     | 706      | 56097.71485                                |
| 03_CtrL2deltaIncA_30hpi_-BFA_VAMP3_63x                                                                        | 0.345 | 33784     | 706      | 94446.44017                                |
|                                                                                                               | 0.416 | 39296     | 706      | 91106.3472                                 |

|                                             |       |        |     |             |
|---------------------------------------------|-------|--------|-----|-------------|
|                                             | 0.349 | 17179  | 706 | 47475.12017 |
|                                             | 0.399 | 25705  | 706 | 62135.29041 |
| 04_Ctrl2deltaIncA_30hpi_-BFA_VAMP3_63x      | 0.4   | 17122  | 706 | 41284.60383 |
|                                             | 0.311 | 11621  | 706 | 36039.33196 |
|                                             | 0.313 | 33522  | 706 | 103294.9772 |
|                                             | 0.4   | 27653  | 706 | 66676.97404 |
|                                             | 0.389 | 25909  | 706 | 64238.39325 |
| 05_Ctrl2deltaIncA_30hpi_-BFA_VAMP3_63x      | 0.542 | 70412  | 724 | 128491.642  |
|                                             | 0.297 | 27219  | 724 | 90644.86394 |
|                                             | 0.371 | 60271  | 724 | 160680.0554 |
|                                             | 0.418 | 36596  | 724 | 86593.40602 |
|                                             | 0.491 | 46829  | 724 | 94332.39847 |
| 06_Ctrl2deltaIncA_30hpi_-BFA_VAMP3_63x      | 0.42  | 37522  | 724 | 88361.72261 |
|                                             | 0.265 | 34308  | 724 | 128049.2422 |
|                                             | 0.601 | 39460  | 724 | 64939.67249 |
| 01_Ctrl2deltaIncA_30hpi_+BFA_VAMP3_63x      | 0.428 | 83143  | 757 | 200893.8863 |
|                                             | 0.508 | 75237  | 757 | 153162.5387 |
|                                             | 0.305 | 32259  | 757 | 109379.4813 |
|                                             | 0.404 | 35549  | 757 | 90997.78513 |
| 02_Ctrl2deltaIncA_30hpi_+BFA_VAMP3_63x      | 0.249 | 66448  | 757 | 275973.4896 |
|                                             | 0.389 | 91784  | 757 | 244006.9395 |
| 04_Ctrl2deltaIncA_30hpi_+BFA_VAMP3_63x      | 0.205 | 67779  | 757 | 341921.2515 |
|                                             | 0.241 | 65354  | 757 | 280439.9814 |
|                                             | 0.272 | 44398  | 757 | 168802.6659 |
| 05_Ctrl2deltaIncA_30hpi_+BFA_VAMP3_63x      | 0.158 | 17724  | 734 | 112483.7103 |
|                                             | 0.35  | 30466  | 734 | 87283.54411 |
|                                             | 0.384 | 68427  | 734 | 178682.1849 |
|                                             | 0.355 | 55942  | 734 | 158013.6535 |
|                                             | 0.322 | 28477  | 734 | 88679.52177 |
|                                             | 0.349 | 43893  | 734 | 126111.5365 |
|                                             | 0.333 | 19588  | 734 | 58983.54092 |
| 06_Ctrl2deltaIncA_30hpi_+BFA_VAMP3_63x      | 0.287 | 44607  | 734 | 155849.7458 |
|                                             | 0.381 | 39399  | 734 | 103691.9883 |
|                                             | 0.168 | 33044  | 734 | 197227.8819 |
| 08_Ctrl2deltaIncA_30hpi_+BFA_VAMP3_63x      | 0.267 | 35347  | 734 | 132747.4775 |
|                                             | 0.214 | 41950  | 734 | 196563.6331 |
|                                             | 0.238 | 51932  | 734 | 218797.8601 |
|                                             | 0.223 | 24431  | 734 | 109855.3873 |
|                                             | 0.223 | 25471  | 734 | 114531.8067 |
|                                             | 0.223 | 19432  | 734 | 87377.09819 |
| 01_Ctl2-dealtalncA_30hpi_-<br>BFA_VAMP3_63x | 1.503 | 135275 | 762 | 93691.98761 |
|                                             | 1.304 | 206922 | 762 | 165185.8971 |
|                                             | 1.626 | 181844 | 762 | 116418.5873 |
|                                             | 0.739 | 56985  | 762 | 80271.24603 |
|                                             | 0.813 | 50822  | 762 | 65073.63942 |
| 02_Ctl2-dealtalncA_30hpi_-<br>BFA_VAMP3_63x | 1.363 | 126327 | 762 | 96481.53783 |
|                                             | 1.363 | 91236  | 762 | 69680.98337 |
|                                             | 1.225 | 66990  | 762 | 56926.93208 |
|                                             | 1.147 | 89613  | 762 | 81330.13421 |
|                                             | 1.147 | 124398 | 762 | 112899.9814 |
|                                             | 0.783 | 83308  | 762 | 110756.4014 |
| 03_Ctl2-dealtalncA_30hpi_-<br>BFA_VAMP3_63x | 1.005 | 77667  | 762 | 80447.8346  |

|                                             |       |        |     |             |
|---------------------------------------------|-------|--------|-----|-------------|
|                                             | 1.56  | 70590  | 762 | 47104.5082  |
|                                             | 1.164 | 61299  | 762 | 54820.66503 |
|                                             | 0.888 | 53295  | 762 | 62476.60058 |
|                                             | 1.529 | 60462  | 762 | 41164.12742 |
|                                             | 0.567 | 64101  | 762 | 117686.226  |
| 04_CtL2-dealtalncA_30hpi_-<br>BFA_VAMP3_63x | 1.045 | 248786 | 762 | 247829.8063 |
|                                             | 1.067 | 150113 | 762 | 146452.8324 |
|                                             | 0.573 | 143901 | 762 | 261428.5898 |
|                                             | 1.09  | 187403 | 762 | 178975.643  |
|                                             | 0.971 | 134382 | 762 | 144067.414  |
|                                             | 1.039 | 184234 | 762 | 184585.7303 |
| 05_CtL2-dealtalncA_30hpi_-<br>BFA_VAMP3_63x | 2.542 | 407547 | 762 | 166896.0448 |
|                                             | 1.957 | 337669 | 762 | 179615.6839 |
|                                             | 0.901 | 162307 | 762 | 187523.7805 |
|                                             | 1.301 | 91148  | 762 | 72931.26347 |
| 01_CtL2-<br>dealtalncA_30hpi_+BFA_VAMP3_63x | 1.202 | 144018 | 789 | 129145.1883 |
|                                             | 0.646 | 103729 | 789 | 173074.7031 |
|                                             | 0.647 | 132980 | 789 | 221537.8671 |
|                                             | 1.283 | 147722 | 789 | 124103.6186 |
|                                             | 0.758 | 55898  | 789 | 79486.42891 |
| 02_CtL2-<br>dealtalncA_30hpi_+BFA_VAMP3_63x | 1.173 | 109134 | 789 | 100283.1537 |
|                                             | 1.108 | 133719 | 789 | 130082.6219 |
|                                             | 1.561 | 214495 | 789 | 148108.5711 |
|                                             | 1.108 | 109273 | 789 | 106301.4108 |
|                                             | 1.028 | 102781 | 789 | 107766.9635 |
|                                             | 0.988 | 104342 | 789 | 113832.9877 |
|                                             | 1.769 | 136142 | 789 | 82952.64065 |
| 03_CtL2-<br>dealtalncA_30hpi_+BFA_VAMP3_63x | 0.638 | 78700  | 789 | 132959.6845 |
|                                             | 1.553 | 217528 | 789 | 150976.5974 |
|                                             | 1.097 | 186285 | 789 | 183036.28   |
|                                             | 1.138 | 144533 | 789 | 136895.9744 |
|                                             | 0.728 | 123798 | 789 | 183293.9673 |
|                                             | 0.717 | 186891 | 789 | 280953.9577 |
|                                             | 0.981 | 221365 | 789 | 243223.6886 |
| 04_CtL2-<br>dealtalncA_30hpi_+BFA_VAMP3_63x | 1.431 | 189673 | 789 | 142866.9594 |
|                                             | 1.019 | 149887 | 789 | 158546.1518 |
|                                             | 1.106 | 216897 | 789 | 211380.2174 |
| 05_CtL2-<br>dealtalncA_30hpi_+BFA_VAMP3_63x | 0.853 | 124327 | 789 | 157102.2284 |
|                                             | 1.228 | 126218 | 789 | 110787.0121 |
|                                             | 1.891 | 135665 | 789 | 77328.96767 |
|                                             | 0.68  | 78779  | 789 | 124872.6917 |

| <b>Intensity of VAMP3 inclusion localization during infection with Ctr L2 ct813::bla (30hpi)</b> |       |           |          |                                            |
|--------------------------------------------------------------------------------------------------|-------|-----------|----------|--------------------------------------------|
| Image ID                                                                                         | Area  | RawIntDen | Gain (V) | (RawIntDen/Area)*(Gain/Normalization Gain) |
| 01_CT813-bla_30hpi_-BFA_VAMP3_63x                                                                | 2.537 | 90280     | 717      | 34856.12929                                |
| 02_CT813-bla_30hpi_-BFA_VAMP3_63x                                                                | 1.842 | 76973     | 717      | 40931.42477                                |
| 03_CT813-bla_30hpi_-BFA_VAMP3_63x                                                                | 1.877 | 161315    | 699      | 82068.5149                                 |

|                                     |       |        |     |             |
|-------------------------------------|-------|--------|-----|-------------|
| 05 CT813-bla 30hpi -BFA VAMP3 63x   | 1.145 | 109798 | 699 | 91570.38442 |
|                                     | 1.332 | 81010  | 699 | 58076.50889 |
| 06 CT813-bla 30hpi -BFA VAMP3 63x   | 2.834 | 86726  | 699 | 29222.37873 |
|                                     | 4.214 | 65884  | 699 | 14929.71516 |
| 01 ct813-bla 30hpi +BFA VAMP3 63x   | 3.423 | 144029 | 732 | 42076.83319 |
|                                     | 2.459 | 55614  | 732 | 22616.51078 |
|                                     | 2.507 | 47962  | 732 | 19131.23255 |
| 02 ct813-bla 30hpi +BFA VAMP3 63x   | 1.642 | 59353  | 732 | 36146.77223 |
|                                     | 1.05  | 41798  | 732 | 39807.61905 |
|                                     | 1.761 | 28878  | 732 | 16398.63714 |
| 03 ct813-bla 30hpi +BFA VAMP3 63x   | 1.362 | 72005  | 732 | 52867.1072  |
|                                     | 3.667 | 110324 | 732 | 30085.62858 |
| 04 ct813-bla 30hpi +BFA VAMP3 63x   | 2.401 | 87185  | 744 | 36907.23128 |
|                                     | 2.155 | 83170  | 744 | 39226.65551 |
|                                     | 1.765 | 54845  | 744 | 31583.05856 |
|                                     | 1.203 | 51383  | 744 | 43412.58875 |
| 05 ct813-bla 30hpi +BFA VAMP3 63x   | 2.481 | 127212 | 744 | 52115.05144 |
|                                     | 2.047 | 80428  | 744 | 39934.7786  |
|                                     | 1.317 | 79862  | 744 | 61633.41922 |
|                                     | 0.976 | 25716  | 744 | 26780.30099 |
| 06 ct813-bla 30hpi +BFA VAMP3 63x   | 2.322 | 83074  | 744 | 36363.42328 |
|                                     | 1.814 | 61774  | 744 | 34612.28695 |
| 01 L2ct813-bla 30hpi -BFA VAMP3 63x | 2.361 | 158503 | 732 | 67133.84159 |
| 02 L2ct813-bla 30hpi -BFA VAMP3 63x | 0.719 | 30809  | 732 | 42849.79138 |
|                                     | 0.759 | 41892  | 732 | 55193.67589 |
| 03 L2ct813-bla 30hpi -BFA VAMP3 63x | 1.62  | 52731  | 732 | 32550       |
|                                     | 1.732 | 109003 | 732 | 62934.75751 |
| 04 L2ct813-bla 30hpi -BFA VAMP3 63x | 1.168 | 66852  | 732 | 57236.30137 |
|                                     | 2.177 | 103970 | 732 | 47758.3831  |
| 05 L2ct813-bla 30hpi -BFA VAMP3 63x | 1.519 | 85764  | 732 | 56460.82949 |
|                                     | 1.717 | 50685  | 732 | 29519.51077 |
| 06 L2ct813-bla 30hpi -BFA VAMP3 63x | 3.886 | 202741 | 732 | 52172.15646 |
|                                     | 2.609 | 95406  | 732 | 36568.03373 |
| 07 L2ct813-bla 30hpi -BFA VAMP3 63x | 2.39  | 146271 | 732 | 61201.25523 |
|                                     | 2.01  | 151125 | 732 | 75186.56716 |
| 08 L2ct813-bla 30hpi -BFA VAMP3 63x | 2.515 | 177913 | 732 | 70740.75547 |
|                                     | 4.845 | 247450 | 732 | 51073.27141 |
| 09 L2ct813-bla 30hpi -BFA VAMP3 63x | 2.19  | 178343 | 732 | 81435.15982 |
|                                     | 1.659 | 77908  | 732 | 46960.81977 |
|                                     | 1.09  | 57778  | 732 | 53007.33945 |
|                                     | 3.202 | 247767 | 732 | 77378.82573 |
| 10 L2ct813-bla 30hpi -BFA VAMP3 63x | 2.573 | 214927 | 732 | 83531.67509 |
|                                     | 2.82  | 297711 | 732 | 105571.2766 |
| 11 L2ct813-bla 30hpi -BFA VAMP3 63x | 2.879 | 93896  | 732 | 32614.10212 |
|                                     | 1.753 | 53606  | 732 | 30579.57787 |
|                                     | 1.844 | 58820  | 732 | 31898.04772 |
| 12 L2ct813-bla 30hpi -BFA VAMP3 63x | 2.194 | 85862  | 732 | 39134.9134  |
|                                     | 2.177 | 143414 | 732 | 65876.89481 |
| 13 L2ct813-bla 30hpi -BFA VAMP3 63x | 0.66  | 41553  | 732 | 62959.09091 |
|                                     | 1.561 | 91192  | 732 | 58418.9622  |
|                                     | 3.493 | 118210 | 732 | 33841.96965 |
|                                     | 2.458 | 103769 | 732 | 42216.84296 |
| 14 L2ct813-bla 30hpi -BFA VAMP3 63x | 2.646 | 95057  | 732 | 35924.79214 |
|                                     | 3.357 | 102217 | 732 | 30448.91272 |

|                                     |       |        |     |             |
|-------------------------------------|-------|--------|-----|-------------|
|                                     | 1.925 | 142121 | 732 | 73829.09091 |
| 15 L2ct813-bla 30hpi -BFA VAMP3 63x | 1.957 | 165037 | 732 | 84331.63005 |
|                                     | 2.642 | 183312 | 732 | 69383.80015 |
| 16 L2ct813-bla 30hpi -BFA VAMP3 63x | 1.824 | 113045 | 732 | 61976.42544 |
|                                     | 2.307 | 90573  | 732 | 39260.07802 |
| 17 L2ct813-bla 30hpi -BFA VAMP3 63x | 2.608 | 56478  | 732 | 21655.67485 |
|                                     | 2.26  | 69054  | 732 | 30554.86726 |
|                                     | 1.16  | 18937  | 732 | 16325       |
| 18 L2ct813-bla 30hpi -BFA VAMP3 63x | 2.992 | 40596  | 732 | 13568.18182 |
|                                     | 1.783 | 36531  | 732 | 20488.50252 |
|                                     | 1.692 | 53431  | 732 | 31578.6052  |
| 19 L2ct813-bla 30hpi -BFA VAMP3 63x | 2.325 | 90891  | 732 | 39092.90323 |
|                                     | 2.021 | 40665  | 732 | 20121.22712 |
| 20 L2ct813-bla 30hpi -BFA VAMP3 63x | 1.593 | 139388 | 732 | 87500.31387 |
|                                     | 2.692 | 139717 | 732 | 51900.81724 |
| 01 L2ct813-bla 30hpi +BFA VAMP3 63x | 2.595 | 176811 | 732 | 68135.26012 |
|                                     | 2.656 | 219421 | 732 | 82613.32831 |
|                                     | 1.857 | 91248  | 732 | 49137.31826 |
| 02 L2ct813-bla 30hpi +BFA VAMP3 63x | 2.563 | 150240 | 732 | 58618.80609 |
|                                     | 1.987 | 110569 | 732 | 55646.2003  |
| 03 L2ct813-bla 30hpi +BFA VAMP3 63x | 1.056 | 41454  | 732 | 39255.68182 |
|                                     | 1.079 | 49558  | 732 | 45929.56441 |
|                                     | 0.627 | 47928  | 732 | 76440.19139 |
| 04 L2ct813-bla 30hpi +BFA VAMP3 63x | 2.898 | 174723 | 732 | 60290.89027 |
|                                     | 1.56  | 100644 | 732 | 64515.38462 |
| 05 L2ct813-bla 30hpi +BFA VAMP3 63x | 1.791 | 170852 | 732 | 95394.75154 |
|                                     | 1.497 | 102994 | 732 | 68800.2672  |
|                                     | 0.49  | 39349  | 732 | 80304.08163 |
|                                     | 0.653 | 29189  | 732 | 44699.84686 |
| 06 L2ct813-bla 30hpi +BFA VAMP3 63x | 0.984 | 119677 | 732 | 121622.9675 |
|                                     | 2.594 | 141161 | 732 | 54418.27294 |
| 07 L2ct813-bla 30hpi +BFA VAMP3 63x | 1.395 | 126930 | 732 | 90989.24731 |
|                                     | 1.437 | 104900 | 732 | 72999.30411 |
|                                     | 0.44  | 12075  | 732 | 27443.18182 |
| 08 L2ct813-bla 30hpi +BFA VAMP3 63x | 1.077 | 98346  | 732 | 91314.76323 |
|                                     | 1.681 | 197929 | 732 | 117744.7948 |
| 09 L2ct813-bla 30hpi +BFA VAMP3 63x | 0.988 | 54368  | 732 | 55028.34008 |
|                                     | 1.531 | 81680  | 732 | 53350.75114 |
| 10 L2ct813-bla 30hpi +BFA VAMP3 63x | 1.162 | 44689  | 732 | 38458.69191 |
|                                     | 1.741 | 71981  | 732 | 41344.62952 |
|                                     | 3.463 | 115615 | 732 | 33385.79267 |
| 11 L2ct813-bla 30hpi +BFA VAMP3 63x | 1.794 | 194854 | 732 | 108614.2698 |
|                                     | 1.613 | 188920 | 732 | 117123.3726 |
| 12 L2ct813-bla 30hpi +BFA VAMP3 63x | 1.839 | 46714  | 732 | 25401.84883 |
|                                     | 1.599 | 26155  | 732 | 16357.09819 |
|                                     | 0.938 | 46816  | 732 | 49910.44776 |
|                                     | 2.535 | 76289  | 732 | 30094.28008 |
| 13 L2ct813-bla 30hpi +BFA VAMP3 63x | 1.408 | 46577  | 732 | 33080.25568 |
|                                     | 1.234 | 25702  | 732 | 20828.20097 |
|                                     | 2.1   | 104960 | 732 | 49980.95238 |
| 14 L2ct813-bla 30hpi +BFA VAMP3 63x | 1.205 | 32602  | 732 | 27055.60166 |
|                                     | 1.778 | 93303  | 732 | 52476.37795 |
|                                     | 1.783 | 45908  | 732 | 25747.61638 |
| 15 L2ct813-bla 30hpi +BFA VAMP3 63x | 1.881 | 47388  | 732 | 25192.98246 |

|                                     |       |       |     |             |
|-------------------------------------|-------|-------|-----|-------------|
|                                     | 0.717 | 57603 | 732 | 80338.91213 |
|                                     | 1.652 | 36416 | 732 | 22043.58354 |
| 16_L2ct813-bla_30hpi_+BFA_VAMP3_63x | 1.818 | 58839 | 732 | 32364.68647 |
|                                     | 1.975 | 42982 | 732 | 21763.03797 |
| 18_L2ct813-bla_30hpi_+BFA_VAMP3_63x | 1.326 | 42292 | 732 | 31894.41931 |
|                                     | 1.644 | 44599 | 732 | 27128.3455  |
|                                     | 0.957 | 29616 | 732 | 30946.70846 |
| 19_L2ct813-bla_30hpi_+BFA_VAMP3_63x | 1.106 | 81108 | 732 | 73334.53888 |
|                                     | 1.327 | 87185 | 732 | 65700.82894 |
|                                     | 1.011 | 29207 | 732 | 28889.2186  |
| 20_L2ct813-bla_30hpi_+BFA_VAMP3_63x | 2.411 | 47614 | 732 | 19748.65201 |
|                                     | 2.128 | 85313 | 732 | 40090.69549 |
|                                     | 2.222 | 54715 | 732 | 24624.21242 |

| Intensity of VAMP3 inclusion localization during infection with Ctr L2 ct005::bla (30hpi) |       |           |          |                                            |
|-------------------------------------------------------------------------------------------|-------|-----------|----------|--------------------------------------------|
| Image ID                                                                                  | Area  | RawIntDen | Gain (V) | (RawIntDen/Area)*(Gain/Normalization Gain) |
| 01_ct005-bla_30hpi_-BFA_VAMP3_63x                                                         | 0.836 | 87614     | 753      | 107808.034                                 |
|                                                                                           | 2.746 | 132764    | 753      | 49735.17964                                |
|                                                                                           | 2.288 | 166716    | 753      | 74955.78499                                |
|                                                                                           | 1.366 | 74397     | 753      | 56025.87128                                |
| 02_ct005-bla_30hpi_-BFA_VAMP3_63x                                                         | 2.535 | 98166     | 753      | 39835.20225                                |
|                                                                                           | 5.662 | 166586    | 753      | 30265.82596                                |
| 03_ct005-bla_30hpi_-BFA_VAMP3_63x                                                         | 2.528 | 90414     | 767      | 37475.1083                                 |
|                                                                                           | 1.302 | 51084     | 767      | 41111.01458                                |
| 04_ct005-bla_30hpi_-BFA_VAMP3_63x                                                         | 0.538 | 64064     | 729      | 118590.0421                                |
|                                                                                           | 2.234 | 87909     | 729      | 39189.21988                                |
|                                                                                           | 3.01  | 196748    | 729      | 65096.89559                                |
| 05_ct005-bla_30hpi_-BFA_VAMP3_63x                                                         | 2.164 | 157991    | 759      | 75701.72684                                |
|                                                                                           | 0.598 | 44240     | 759      | 76708.70113                                |
|                                                                                           | 2.678 | 207295    | 759      | 80261.80995                                |
|                                                                                           | 2.044 | 75283     | 759      | 38189.74167                                |
| 06_ct005-bla_30hpi_-BFA_VAMP3_63x                                                         | 2.035 | 102672    | 759      | 52314.04519                                |
|                                                                                           | 2.201 | 115002    | 759      | 54177.13632                                |
|                                                                                           | 1.601 | 117721    | 759      | 76241.82888                                |
| 01_ct005-bla_30hpi_+BFA_VAMP3_63x                                                         | 1.783 | 171579    | 776      | 102014.858                                 |
|                                                                                           | 2.271 | 375406    | 776      | 175240.5936                                |
|                                                                                           | 2.507 | 340975    | 776      | 144184.5892                                |
| 02_ct005-bla_30hpi_+BFA_VAMP3_63x                                                         | 2.016 | 210717    | 776      | 110805.0839                                |
|                                                                                           | 2.211 | 251113    | 776      | 120401.2773                                |
|                                                                                           | 3.449 | 286109    | 776      | 87940.50703                                |
| 03_ct005-bla_30hpi_+BFA_VAMP3_63x                                                         | 0.78  | 115903    | 721      | 146360.626                                 |
|                                                                                           | 2.181 | 79901     | 721      | 36084.5034                                 |
|                                                                                           | 5.326 | 195580    | 721      | 36169.91293                                |
|                                                                                           | 2.746 | 202171    | 721      | 72517.44763                                |
|                                                                                           | 3.737 | 81391     | 721      | 21452.47825                                |
| 04_ct005-bla_30hpi_+BFA_VAMP3_63x                                                         | 0.553 | 57828     | 735      | 105000                                     |
|                                                                                           | 2.193 | 79689     | 735      | 36486.81909                                |
|                                                                                           | 4.295 | 231372    | 735      | 54090.86051                                |
|                                                                                           | 6.904 | 344643    | 735      | 50123.90952                                |
| 05_ct005-bla_30hpi_+BFA_VAMP3_63x                                                         | 4.746 | 309519    | 754      | 67176.88234                                |
|                                                                                           | 4.461 | 214872    | 754      | 49614.41418                                |
|                                                                                           | 2.784 | 129244    | 754      | 47819.10291                                |
|                                                                                           | 2.333 | 152385    | 754      | 67280.27306                                |

|                                     |       |        |     |             |
|-------------------------------------|-------|--------|-----|-------------|
| 06 ct005-bla 30hpi +BFA VAMP3 63x   | 2.264 | 135760 | 740 | 60620.01583 |
|                                     | 1.981 | 170771 | 740 | 87146.56725 |
|                                     | 1.509 | 166229 | 740 | 111362.2998 |
|                                     | 3.355 | 172452 | 740 | 51963.25523 |
|                                     | 1.777 | 142069 | 740 | 80822.54736 |
|                                     | 1.955 | 54942  | 740 | 28410.46497 |
| 01 L2ct005-bla 30hpi -BFA VAMP3 63x | 1.021 | 80678  | 747 | 80637.843   |
|                                     | 0.904 | 81867  | 747 | 92416.59564 |
|                                     | 3.591 | 97679  | 747 | 27758.45693 |
|                                     | 1.385 | 44400  | 747 | 32714.68308 |
|                                     | 0.461 | 16617  | 747 | 36784.19153 |
| 02 L2ct005-bla 30hpi -BFA VAMP3 63x | 2.435 | 199669 | 747 | 83679.90878 |
|                                     | 1.668 | 181030 | 747 | 110755.1745 |
|                                     | 1.176 | 83289  | 747 | 72275.29065 |
|                                     | 0.776 | 56339  | 747 | 74089.54601 |
|                                     | 1.235 | 116776 | 747 | 96493.07759 |
| 03 L2ct005-bla 30hpi -BFA VAMP3 63x | 1.259 | 46574  | 732 | 36992.85147 |
|                                     | 1.485 | 50952  | 732 | 34311.11111 |
|                                     | 0.653 | 28274  | 732 | 43298.62175 |
|                                     | 2.46  | 114004 | 732 | 46343.08943 |
|                                     | 1.993 | 77623  | 732 | 38947.81736 |
|                                     | 2.261 | 90908  | 732 | 40206.98806 |
|                                     | 1.818 | 28915  | 732 | 15904.84048 |
| 04 L2ct005-bla 30hpi -BFA VAMP3 63x | 2.623 | 165927 | 732 | 63258.48265 |
|                                     | 2.349 | 95336  | 732 | 40585.78118 |
|                                     | 2.758 | 131611 | 732 | 47719.72444 |
|                                     | 2.562 | 67112  | 732 | 26195.16003 |
| 05 L2ct005-bla 30hpi -BFA VAMP3 63x | 1.228 | 92150  | 732 | 75040.71661 |
|                                     | 1.07  | 76182  | 732 | 71198.13084 |
|                                     | 1.942 | 72340  | 732 | 37250.25747 |
|                                     | 1.855 | 131846 | 732 | 71076.01078 |
| 06 L2ct005-bla 30hpi -BFA VAMP3 63x | 1.463 | 129450 | 732 | 88482.57006 |
|                                     | 1.78  | 158973 | 732 | 89310.67416 |
|                                     | 0.653 | 36945  | 732 | 56577.33538 |
|                                     | 2.349 | 108313 | 732 | 46110.25968 |
| 07 L2ct005-bla 30hpi -BFA VAMP3 63x | 2.052 | 161348 | 732 | 78629.62963 |
|                                     | 0.938 | 38873  | 732 | 41442.4307  |
|                                     | 0.44  | 20866  | 732 | 47422.72727 |
|                                     | 1.115 | 41171  | 732 | 36924.66368 |
|                                     | 2.203 | 40663  | 732 | 18458.0118  |
|                                     | 1.05  | 33342  | 732 | 31754.28571 |
| 08 L2ct005-bla 30hpi -BFA VAMP3 63x | 2.932 | 461486 | 732 | 157396.3165 |
|                                     | 1.102 | 113362 | 732 | 102869.3285 |
|                                     | 0.919 | 60509  | 732 | 65842.2198  |
|                                     | 2.681 | 160588 | 732 | 59898.54532 |
| 09 L2ct005-bla 30hpi -BFA VAMP3 63x | 2.445 | 134766 | 732 | 55119.0184  |
|                                     | 0.922 | 48929  | 732 | 53068.32972 |
|                                     | 2.195 | 70269  | 732 | 32013.21185 |
|                                     | 4.318 | 183686 | 732 | 42539.60167 |
|                                     | 2.608 | 114574 | 732 | 43931.74847 |
|                                     | 0.668 | 33093  | 732 | 49540.41916 |
|                                     | 2.814 | 64091  | 732 | 22775.76404 |
| 10 L2ct005-bla 30hpi -BFA VAMP3 63x | 4.785 | 213288 | 732 | 44574.29467 |
|                                     | 4.971 | 183105 | 732 | 36834.64092 |

|                                     |       |        |     |             |
|-------------------------------------|-------|--------|-----|-------------|
|                                     | 1.623 | 146284 | 732 | 90131.85459 |
|                                     | 2.108 | 106072 | 732 | 50318.78558 |
| 11 L2ct005-bla 30hpi -BFA VAMP3 63x | 1.28  | 158191 | 732 | 123586.7188 |
|                                     | 0.989 | 55446  | 732 | 56062.68959 |
|                                     | 0.789 | 102350 | 732 | 129721.166  |
|                                     | 0.682 | 84617  | 732 | 124071.8475 |
|                                     | 3.317 | 212574 | 732 | 64086.22249 |
| 12 L2ct005-bla 30hpi -BFA VAMP3 63x | 2.239 | 211545 | 732 | 94481.91157 |
|                                     | 2.996 | 252308 | 732 | 84214.95327 |
|                                     | 2.549 | 284069 | 732 | 111443.3111 |
| 13 L2ct005-bla 30hpi -BFA VAMP3 63x | 1.613 | 78942  | 732 | 48941.10353 |
|                                     | 2.787 | 118834 | 732 | 42638.67958 |
|                                     | 3.547 | 318142 | 732 | 89693.26191 |
|                                     | 1.156 | 34795  | 732 | 30099.48097 |
|                                     | 0.586 | 75158  | 732 | 128255.9727 |
|                                     | 1.259 | 64817  | 732 | 51482.92295 |
|                                     | 0.801 | 39251  | 732 | 49002.49688 |
| 14 L2ct005-bla 30hpi -BFA VAMP3 63x | 1.244 | 145648 | 732 | 117080.3859 |
|                                     | 0.821 | 46381  | 732 | 56493.30085 |
|                                     | 2.496 | 209230 | 732 | 83826.12179 |
|                                     | 4.43  | 325532 | 732 | 73483.52144 |
| 15 L2ct005-bla 30hpi -BFA VAMP3 63x | 4.144 | 280671 | 732 | 67729.48842 |
|                                     | 2.979 | 272769 | 732 | 91563.94763 |
|                                     | 1.223 | 68346  | 732 | 55883.89207 |
| 01 L2ct005-bla 30hpi +BFA VAMP3 63x | 0.819 | 14712  | 732 | 17963.36996 |
|                                     | 0.822 | 75798  | 732 | 92211.67883 |
|                                     | 2.577 | 147383 | 732 | 57191.69577 |
|                                     | 2.43  | 212679 | 732 | 87522.22222 |
|                                     | 1.238 | 99280  | 732 | 80193.86107 |
| 02 L2ct005-bla 30hpi +BFA VAMP3 63x | 0.683 | 37919  | 732 | 55518.30161 |
|                                     | 1.332 | 158581 | 732 | 119054.8048 |
|                                     | 2.869 | 261921 | 732 | 91293.48205 |
|                                     | 1.938 | 126550 | 732 | 65299.27761 |
|                                     | 2.385 | 217519 | 732 | 91202.93501 |
| 03 L2ct005-bla 30hpi +BFA VAMP3 63x | 0.955 | 48304  | 732 | 50580.10471 |
|                                     | 2.306 | 120043 | 732 | 52056.80833 |
|                                     | 1.943 | 135754 | 732 | 69868.24498 |
|                                     | 2.328 | 132463 | 732 | 56899.91409 |
|                                     | 0.984 | 47980  | 732 | 48760.1626  |
| 04 L2ct005-bla 30hpi +BFA VAMP3 63x | 3.866 | 216762 | 732 | 56068.80497 |
|                                     | 2.25  | 61328  | 732 | 27256.88889 |
|                                     | 1.878 | 103488 | 732 | 55105.43131 |
|                                     | 1.368 | 63371  | 732 | 46323.83041 |
|                                     | 0.931 | 36359  | 732 | 39053.70569 |
|                                     | 1.917 | 102257 | 732 | 53342.20136 |
|                                     | 2.276 | 80522  | 732 | 35378.73462 |
|                                     | 1.455 | 67153  | 732 | 46153.2646  |
|                                     | 1.408 | 68452  | 732 | 48616.47727 |
|                                     | 1.107 | 52616  | 732 | 47530.26197 |
| 05 L2ct005-bla 30hpi +BFA VAMP3 63x | 4.083 | 370251 | 732 | 90681.11683 |
|                                     | 3.484 | 179000 | 732 | 51377.72675 |
|                                     | 1.875 | 94264  | 732 | 50274.13333 |
|                                     | 1.314 | 84548  | 732 | 64343.98782 |
|                                     | 1.3   | 147194 | 732 | 113226.1538 |



|    |                                  |       |        |     |             |
|----|----------------------------------|-------|--------|-----|-------------|
| 06 | L2ct005-bla_30hpi_+BFA_VAMP3_63x | 2.562 | 164764 | 732 | 64310.69477 |
|    |                                  | 2.236 | 171139 | 732 | 76538.01431 |
|    |                                  | 1.484 | 200272 | 732 | 134954.1779 |
|    |                                  | 2.017 | 227487 | 732 | 112784.829  |
| 07 | L2ct005-bla_30hpi_+BFA_VAMP3_63x | 2.002 | 179094 | 732 | 89457.54246 |
|    |                                  | 2.777 | 131499 | 732 | 47352.89881 |
|    |                                  | 1.018 | 53984  | 732 | 53029.46955 |
|    |                                  | 0.962 | 22107  | 732 | 22980.24948 |
|    |                                  | 1.086 | 45194  | 732 | 41615.10129 |
|    |                                  | 1.307 | 127030 | 732 | 97192.04285 |
|    |                                  | 2.322 | 89115  | 732 | 38378.55297 |
|    |                                  | 0.842 | 86085  | 732 | 102238.7173 |
| 08 | L2ct005-bla_30hpi_+BFA_VAMP3_63x | 1.397 | 117359 | 732 | 84007.87402 |
|    |                                  | 1.381 | 52729  | 732 | 38181.75235 |
|    |                                  | 3.323 | 106259 | 732 | 31976.82817 |
|    |                                  | 2.151 | 49638  | 732 | 23076.70851 |
|    |                                  | 0.812 | 57884  | 732 | 71285.71429 |
|    |                                  | 0.311 | 42424  | 732 | 136411.5756 |
|    |                                  | 2.835 | 93619  | 732 | 33022.57496 |
|    |                                  | 1.805 | 133443 | 732 | 73929.63989 |
| 09 | L2ct005-bla_30hpi_+BFA_VAMP3_63x | 1.994 | 134530 | 732 | 67467.40221 |
|    |                                  | 1.55  | 70057  | 732 | 45198.06452 |
|    |                                  | 0.527 | 46655  | 732 | 88529.41176 |
|    |                                  | 1.664 | 49463  | 732 | 29725.36058 |
|    |                                  | 1.301 | 39301  | 732 | 30208.30131 |
| 10 | L2ct005-bla_30hpi_+BFA_VAMP3_63x | 1.928 | 68167  | 732 | 35356.3278  |
|    |                                  | 2.624 | 107926 | 732 | 41130.33537 |
|    |                                  | 0.439 | 59159  | 732 | 134758.5421 |
| 11 | L2ct005-bla_30hpi_+BFA_VAMP3_63x | 1.792 | 160934 | 732 | 89806.91964 |
|    |                                  | 0.609 | 70935  | 732 | 116477.8325 |
|    |                                  | 2.196 | 205121 | 732 | 93406.64845 |
|    |                                  | 1.13  | 91959  | 732 | 81379.64602 |
|    |                                  | 1.876 | 125411 | 732 | 66850.21322 |
|    |                                  | 2.61  | 252138 | 732 | 96604.5977  |
|    |                                  | 2.42  | 225225 | 732 | 93068.18182 |
|    |                                  | 0.595 | 30157  | 732 | 50684.03361 |
| 12 | L2ct005-bla_30hpi_+BFA_VAMP3_63x | 2.305 | 137930 | 732 | 59839.47939 |
|    |                                  | 1.605 | 71825  | 732 | 44750.77882 |
|    |                                  | 1.417 | 116568 | 732 | 82263.9379  |
|    |                                  | 0.708 | 125153 | 732 | 176769.774  |
|    |                                  | 1.259 | 140751 | 732 | 111795.8697 |
|    |                                  | 1.818 | 220042 | 732 | 121035.2035 |
|    |                                  | 1.107 | 47344  | 732 | 42767.84101 |
|    |                                  | 0.616 | 26124  | 732 | 42409.09091 |
| 13 | L2ct005-bla_30hpi_+BFA_VAMP3_63x | 4.159 | 162364 | 732 | 39039.19211 |
|    |                                  | 4.188 | 212793 | 732 | 50810.17192 |
|    |                                  | 3.624 | 305576 | 732 | 84320.0883  |
|    |                                  | 1.06  | 56378  | 732 | 53186.79245 |
| 14 | L2ct005-bla_30hpi_+BFA_VAMP3_63x | 1.533 | 141889 | 732 | 92556.42531 |
|    |                                  | 4.931 | 211798 | 732 | 42952.34232 |
|    |                                  | 2.453 | 184689 | 732 | 75291.07216 |
|    |                                  | 1.863 | 181636 | 732 | 97496.511   |
|    |                                  | 6.259 | 154850 | 732 | 24740.37386 |
| 15 | L2ct005-bla_30hpi_+BFA_VAMP3_63x | 0.666 | 35885  | 732 | 53881.38138 |

|  |       |        |     |             |
|--|-------|--------|-----|-------------|
|  | 2.274 | 164759 | 732 | 72453.3861  |
|  | 0.888 | 132258 | 732 | 148939.1892 |
|  | 1.45  | 120666 | 732 | 83217.93103 |
|  | 0.981 | 86554  | 732 | 88230.37717 |
|  | 2.535 | 334260 | 732 | 131857.9882 |
|  | 1.428 | 96293  | 732 | 67432.07283 |

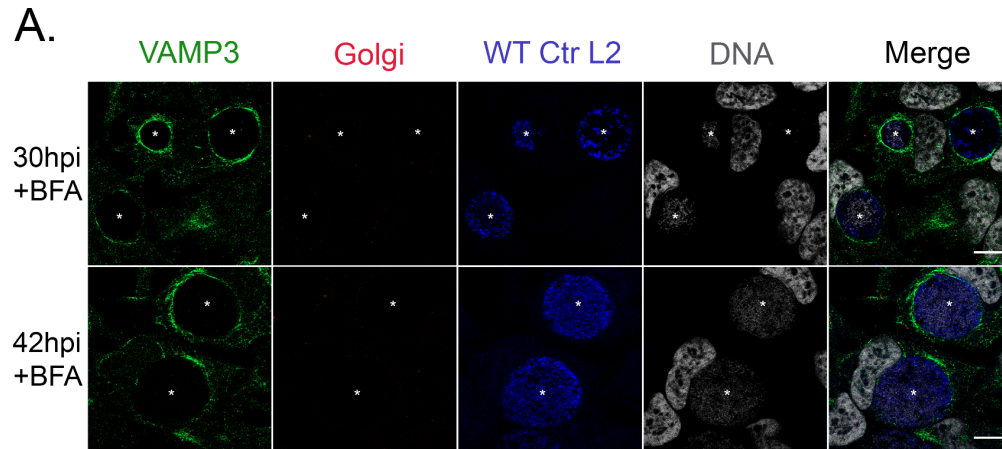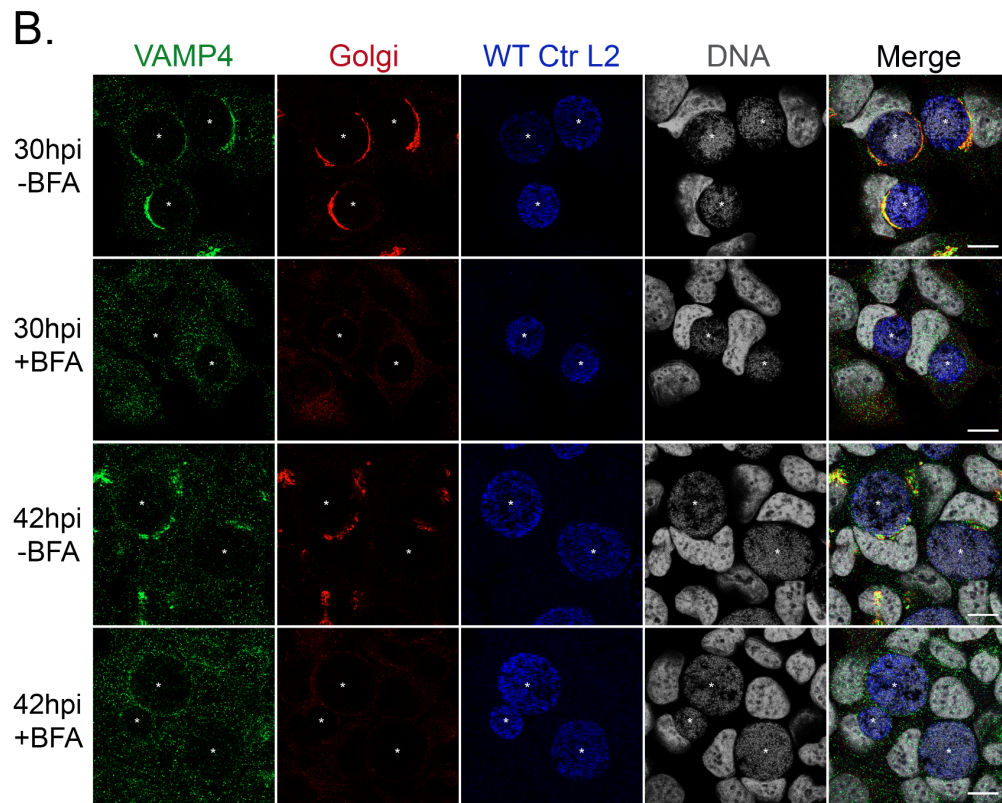

8 **Supplemental Figure 1. VAMP4's, but not VAMP3's, localization to Ctr L2**  
9 **inclusions is largely Golgi associated.** HeLa cells seeded on glass coverslips in 24-  
10 well plate were infected with WT Ctr L2 (MOI of 0.5) for either 30 or 42 hours. Two  
11 hours prior to fixation, infected cells were either treated or not with 1 µg/mL Brefeldin A  
12 (BFA) to collapse the Golgi as indicated by absence of an intact Golgi structure in +BFA  
13 samples. Cells were then fixed at either 30 or 42 hpi in 4% paraformaldehyde (PFA) for  
14 15 min at room temperature and permeabilized with 0.5% Triton X-100 for 5 min at  
15 room temperature. Fixed cells and permeabilized cells were processed for indirect  
16 immunofluorescence to detect endogenous VAMP3 or VAMP4 (green), Golgi (red),  
17 *Chlamydia*/MOMP (blue), and DNA (gray), see antibody table for specific antibodies  
18 used. Images were taken on a Zeiss LSM 800 Confocal at 63x magnification. White  
19 stars denote chlamydial inclusions. Scale bar = 10 µm. Images were compiled using  
20 Photoshop 21.1. A) In the presence of BFA (+BFA), VAMP3 still localizes to Ctr L2  
21 inclusions comparable to untreated cells at both 30 and 42 hpi (Figure 1). Thus,  
22 VAMP3's localization to Ctr L2 inclusions is independent of the Golgi. B) VAMP4  
23 localizes to Ctr L2 inclusions at 30 and 42 hpi in untreated cells (-BFA), with this  
24 localization decreasing at 42 hpi. In cells treated with BFA to collapse the Golgi (+BFA),  
25 VAMP4's localization is greatly decreased where there are only small vesicular  
26 structures around the inclusion. Thus, VAMP4's Ctr L2 inclusion localization is mostly  
27 dependent on the Golgi structure.

28

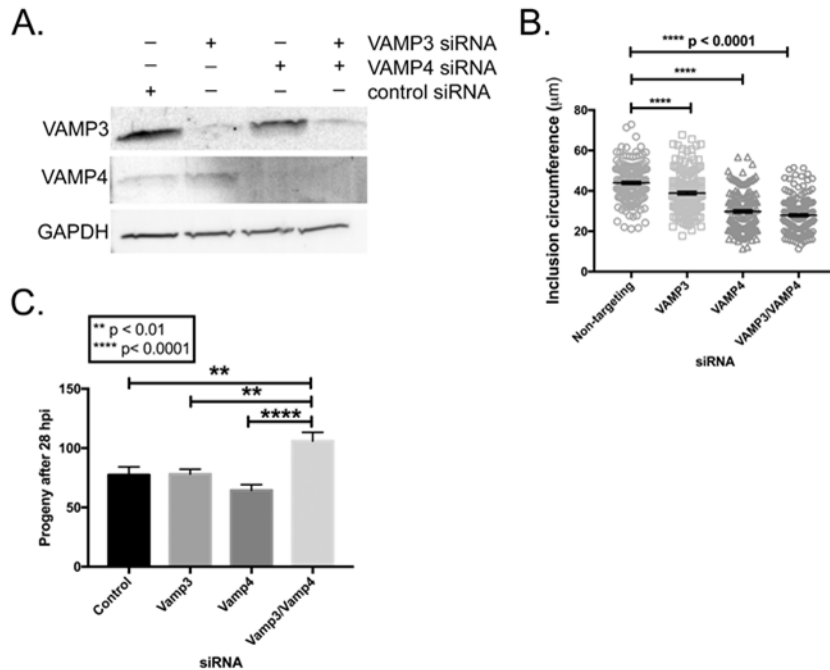

29

30 **Supplemental Figure 2. siRNA knockdown of VAMP3 and VAMP4 decrease the**  
 31 **circumference of chlamydial inclusions.** HeLa cells were reverse transfected with

32 indicated siRNA for 18 hours and then infected with Ctr L2. At 30 hours post-infection  
 33 (hpi) cell lysates were collected and A) knockdown efficiency was determined via  
 34 western blotting with antibodies against VAMP3, VAMP4, and loading control GAPDH  
 35 (image is representative of three independent experiments), or B & C) coverslips were  
 36 fixed in 4% paraformaldehyde and processed for indirect immunofluorescence to detect  
 37 the chlamydial IM (Sheep anti-IncA) or chlamydial organisms (Guinea pig anti-L2).

38 Images were acquired on a Zeiss Apotome at 40x. B) Inclusion circumferences of 150  
 39 total inclusions were measured using Fiji. Data shown are from three independent

40 experiments, where 50 inclusions were measured per experiment. C) Infectious progeny  
 41 was determined by lysing infected cells at 30 hpi to harvest the bacteria and then,  
 42 titring the bacteria-containing lysates to re-infect fresh HeLa cell monolayers. At 28 hpi,

43 the secondary infection samples were fixed and processed for indirect  
44 immunofluorescence to detect chlamydial organisms (Guinea pig anti-L2). Images were  
45 acquired on a Zeiss Apotome at 40x, and the number of inclusions (inclusion forming  
46 units, IFUs) were enumerated. The number of progeny per inclusion were obtained by  
47 taking the IFU from the secondary infection and dividing it by the IFU of the primary  
48 infection. Data shown are from two independent experiments. Antibodies used are  
49 provided in Supplemental Table 2. Data were compiled, analyzed, and graphed using  
50 GraphPad Prism software. An ordinary one-way ANOVA with Tukey's host post-hoc test  
51 for multiple comparisons was performed where \*\* $p < 0.01$  and \*\*\*\* $p < 0.0001$ .

52

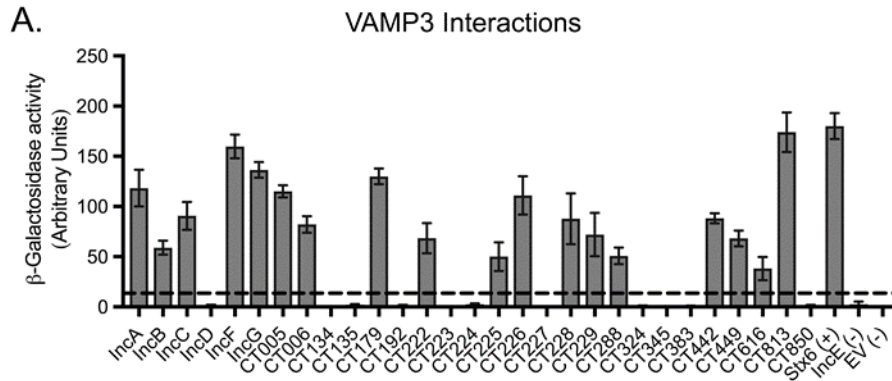

**B.**

| Inc   | Replicate 1 | Replicate 2 | Replicate 3 |
|-------|-------------|-------------|-------------|
| IncA  | -           | +           | +           |
| IncB  | +           | +           | +           |
| IncC  | -           | +           | +           |
| IncD  | -           | -           | -           |
| IncE  | -           | -           | -           |
| IncF  | +           | +           | +           |
| IncG  | +           | +           | +           |
| CT005 | +           | +           | +           |
| CT006 | +           | +           | +           |
| CT134 | -           | -           | -           |
| CT135 | -           | -           | -           |
| CT179 | +           | +           | +           |
| CT192 | -           | -           | -           |
| CT222 | -           | +           | +           |
| CT223 | -           | -           | +           |
| CT224 | -           | -           | -           |
| CT225 | -           | -           | -           |
| CT226 | +           | -           | -           |
| CT227 | -           | -           | -           |
| CT228 | -           | +           | -           |
| CT229 | -           | +           | -           |
| CT288 | -           | +           | -           |
| CT324 | -           | -           | -           |
| CT345 | -           | -           | -           |
| CT383 | -           | -           | -           |
| CT442 | +           | +           | +           |
| CT449 | +           | +           | +           |
| CT616 | +           | -           | -           |
| CT813 | +           | +           | +           |
| CT850 | -           | -           | -           |

53

54 **Supplemental Figure 3. Complete data set from three replicates of VAMP3-Inc**

55 **BACTH screen.** A) All data points from VAMP3-Inc screen for protein-protein

56 interactions. Dashed line indicates a cutoff for positive interactions calculated by 5x the

57 negative control, EV (empty vector) and IncE. B) Table of which interactions were

58 positive (+) or negative (-) between each biological replicate for interactions with

59 VAMP3.

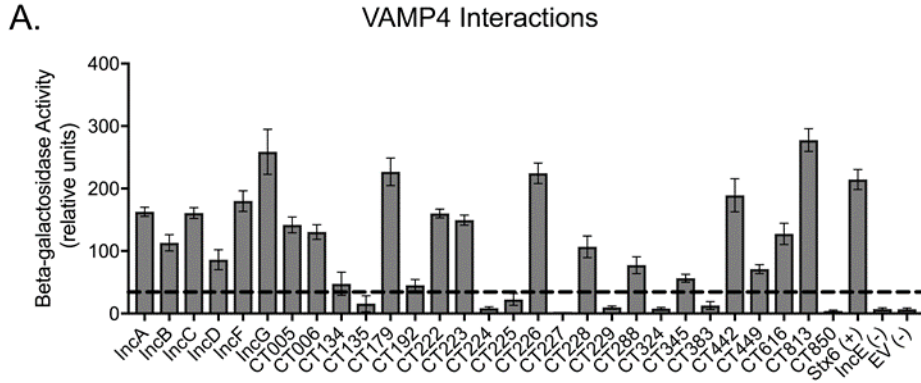

**B.**

| Inc   | Replicate 1 | Replicate 2 | Replicate 3 |
|-------|-------------|-------------|-------------|
| IncA  | +           | +           | +           |
| IncB  | +           | +           | -           |
| IncC  | +           | +           | +           |
| IncD  | +           | +           | -           |
| IncE  | -           | -           | -           |
| IncF  | +           | +           | +           |
| IncG  | +           | +           | +           |
| CT005 | +           | +           | +           |
| CT006 | +           | +           | +           |
| CT134 | -           | -           | -           |
| CT135 | -           | -           | -           |
| CT179 | +           | +           | +           |
| CT192 | -           | -           | +           |
| CT222 | +           | +           | +           |
| CT223 | +           | +           | +           |
| CT224 | -           | -           | -           |
| CT225 | -           | +           | -           |
| CT226 | +           | +           | +           |
| CT227 | -           | -           | -           |
| CT228 | +           | +           | -           |
| CT229 | -           | -           | -           |
| CT288 | +           | -           | -           |
| CT324 | -           | -           | -           |
| CT345 | -           | -           | -           |
| CT383 | -           | -           | -           |
| CT442 | +           | +           | +           |
| CT449 | +           | +           | +           |
| CT616 | -           | +           | +           |
| CT813 | +           | +           | +           |
| CT850 | -           | -           | -           |

60

61 **Supplemental Figure 4. Complete data set from three replicates of VAMP4-Inc**

62 **BACTH screen.** A) All data points from VAMP4-Inc screen for protein-protein

63 interactions. Dashed line indicates a cutoff for positive interactions calculated by 5x the

64 negative control, EV (empty vector) and IncE. B) Table of which interactions were

65 positive (+) or negative (-) between each biological replicate for interactions with

66 VAMP4.

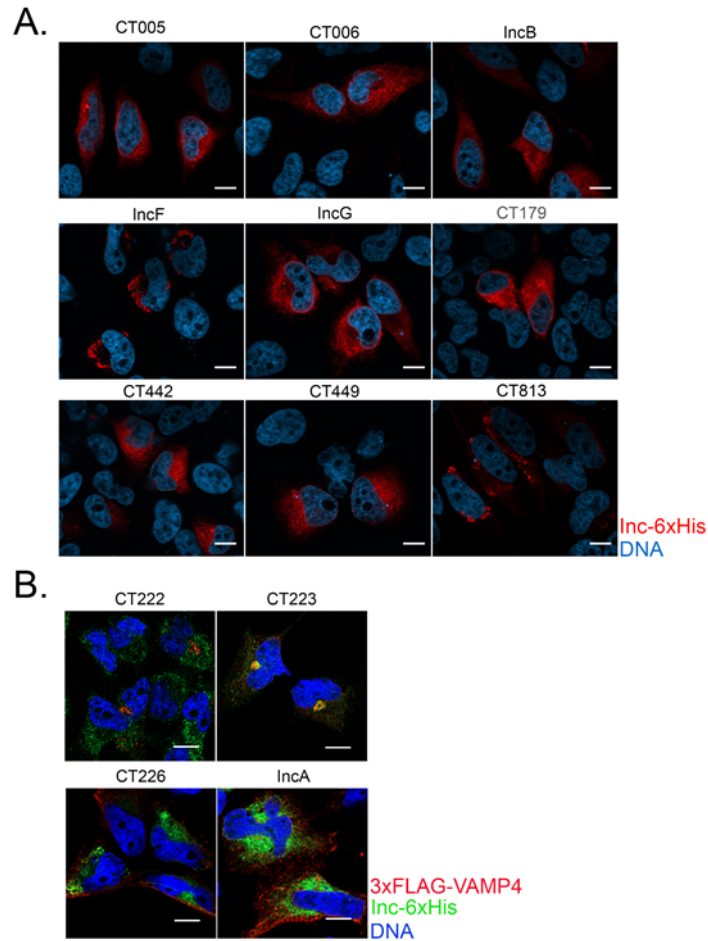

67

68 **Supplemental Figure 5. Expression of chlamydial inclusion membrane proteins in**  
 69 **a eukaryotic system.** A) HeLa cells were transfected with one of various pCMV7.1-Inc-  
 70 6xHis plasmids at a concentration of 150 ng (CT005- and CT813-6xHis) or 250 ng  
 71 (IncB-, IncF-, IncG-, CT179-, CT442-, and CT449-6xHis) per well of 24-well plate. At 24  
 72 h post-transfection, samples were fixed in 100% methanol and processed for indirect  
 73 immunofluorescence against 6xHis (red) and DNA (blue). Images were taken on a Zeiss  
 74 ApoTome.2 fluorescence microscope at a 100× magnification. Scale bar = 10 μm. B)  
 75 HeLa cells were co-transfected with pCMV7.1\_3xFLAG-VAMP4 and pCMV7.1\_Inc-  
 76 6xHis for CT222-, CT223-, CT226-, and IncA-6xHis. 24 h post-transfection, cells were  
 77 fixed in 4% PFA, permeabilized with 0.5% Triton x-100 and processed via indirect



78 immunofluorescence against FLAG (red), 6xHis (green), and DNA (blue). Images were  
79 taken on a Zeiss LSM 800 Confocal at 63x magnification. Scale bar = 10  $\mu\text{m}$ .

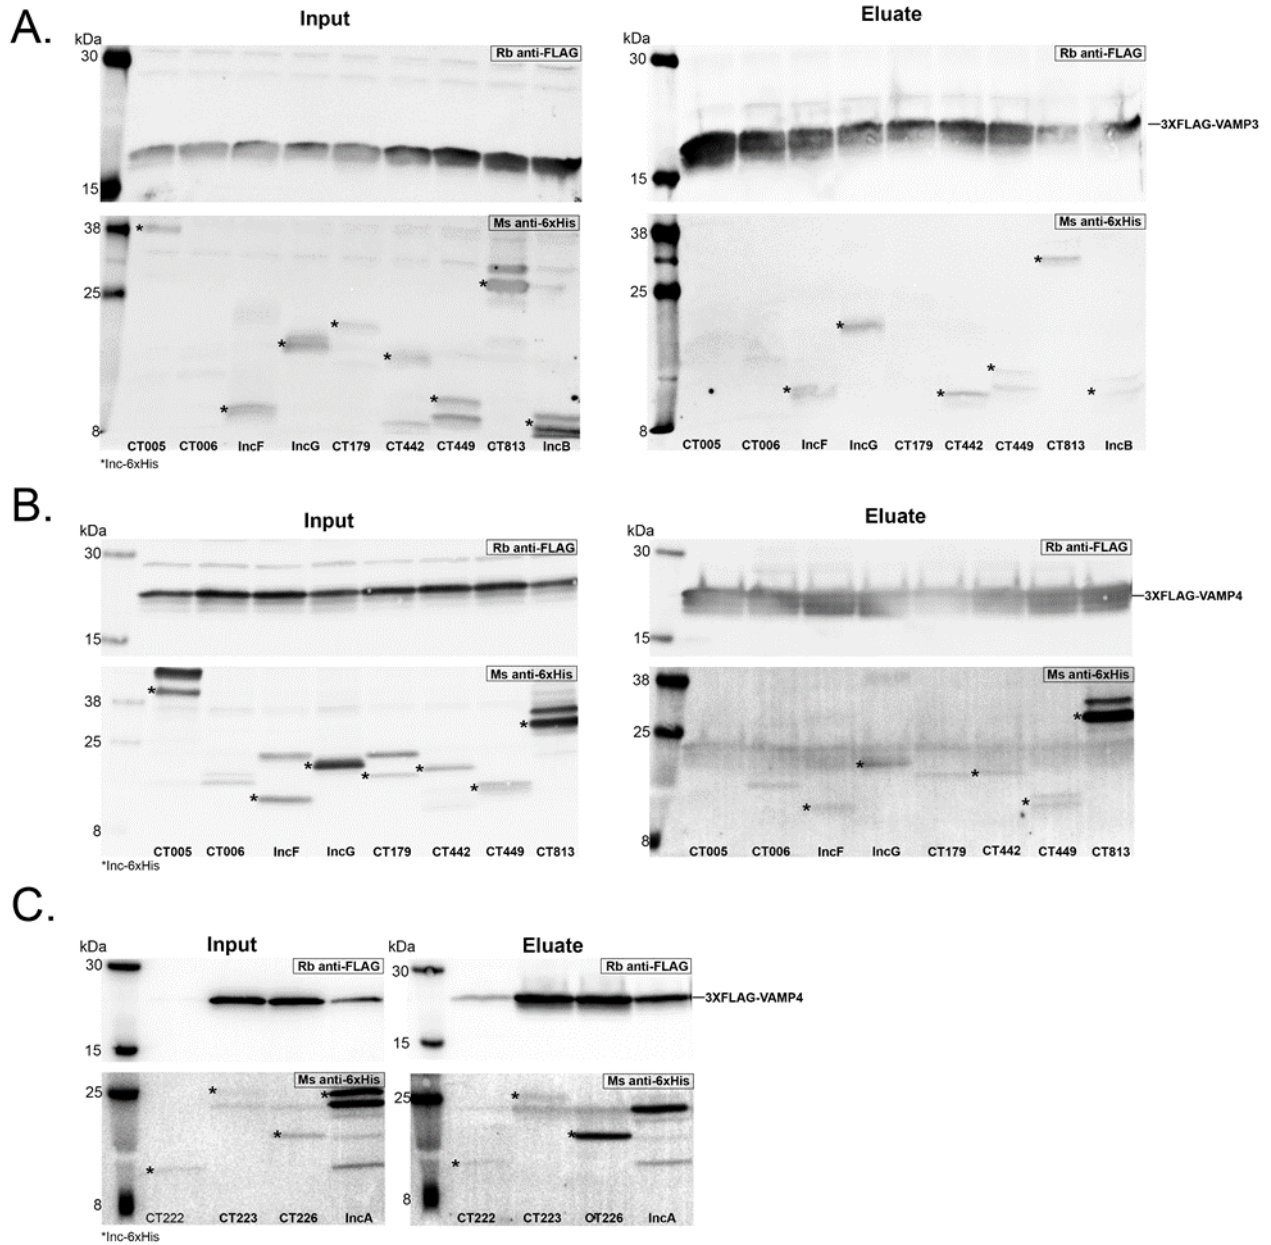

80 **Supplemental Figure 6. Co-transfection of VAMPs and IncS to determine the**  
 81 **protein-protein interactions in uninfected HeLa cells.** HeLa cells seeded in a 6-well  
 82 plate or a 100 mm dish were co-transfected either with 3xFLAG-VAMP3 or 3xFLAG-  
 83 VAMP4 and Inc-6xHis constructs (see Materials and Methods for specific details). At 24  
 84 hours post-transfection, the cells were collected, solubilized, and affinity purified using  
 85 anti-FLAG magnetic beads. The clarified lysates (input fraction) and eluate fractions

86 were immunoblotted for protein expression and positive interactions, respectively (IncA-  
87 6xHis, 31.3 kDa; IncB-6xHis, 13.2 kDa; IncF-6xHis, 11.3 kDa; IncG-6xHis, 18.4 kDa;  
88 CT005-6xHis, 40.6 kDa; CT179-6xHis, 24.0 kDa; CT222-6xHis, 14.9 kDa; CT223-6xHis,  
89 30.4 kDa; CT226-6xHis, 19.9 kDa; CT442-6xHis, 17.0 kDa; CT449-6xHis, 13.0 kDa;  
90 CT813-6xHis, 30.6 kDa; 3xFLAG-VAMP3; 16.6 kDa; and 3xFLAG-VAMP4; 19.6 kDa).

91 (A) Input and eluate fractions from co-immunoprecipitation assays with 3xFLAG-VAMP3  
92 and Inc-6xHis; (B) Input and eluate fractions from co-immunoprecipitation assays with  
93 3xFLAG-VAMP4 and Inc-6xHis proteins that were shared between VAMPs 3 and 4 in  
94 the initial BACTH screen (Figure 3). (C) Input and eluate fractions from co-  
95 immunoprecipitation assays with 3xFLAG-VAMP4 and Inc-6xHis proteins that were  
96 specific only for VAMP4 in the initial BACTH screen (Figure 3). The data shown are  
97 representative of three independent experiments. Black stars denote specific bands for  
98 each protein based on predicted sizes.

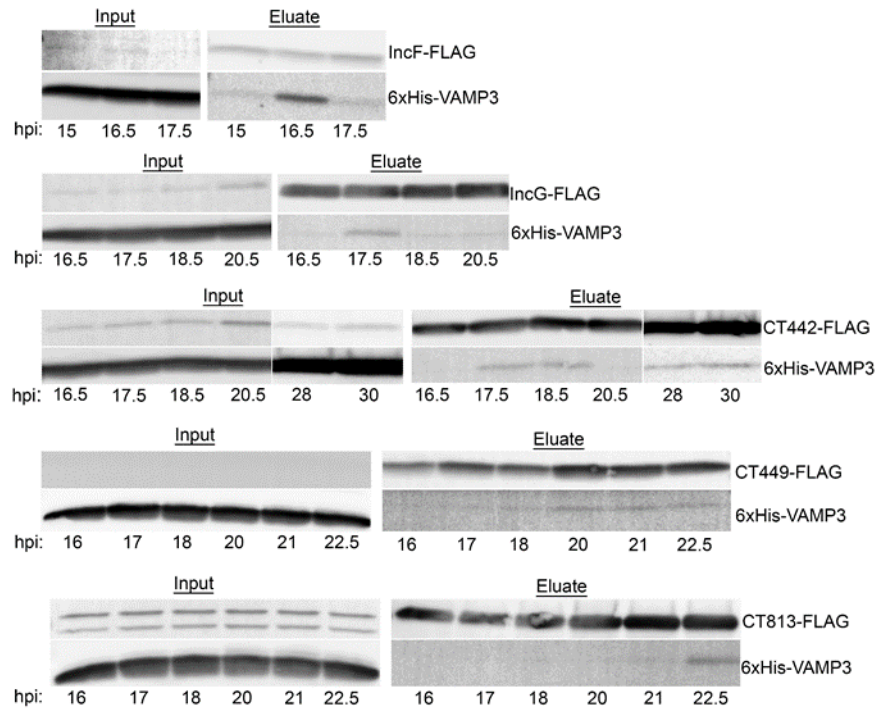

99

100 **Supplemental Figure 7. Input and corresponding eluate fractions from Inc-FLAG**  
 101 **pulldowns in Ctr L2 infected cells.** Positive 6xHis-VAMP3 and Inc-FLAG interactions  
 102 identified from coimmunoprecipitation in chlamydial infected cells. HeLa cells seeded 6-  
 103 well plates were transfected with 6xHis-VAMP3 prior to infection with transformed  
 104 strains of Ctr L2 with the indicated pBOMB4\_Inc-FLAG plasmids. Inc-FLAG expression  
 105 was induced at 7 hpi with 5 nM aTc (CT442-FLAG) or 1 nM aTc (IncF-FLAG, IncG-  
 106 FLAG, CT449-FLAG, and CT813-FLAG) (see Materials and Methods for specific  
 107 details). At indicated time points post infection, the cell lysates were collected,  
 108 solubilized, and affinity purified using anti-FLAG magnetic beads. The input and eluate  
 109 fractions were immunoblotted for protein expression at the predicted sizes; IncF-FLAG,  
 110 11.3 kDa; IncG-FLAG, 18.4 kDa; CT442-FLAG, 17.0 kDa; CT449-FLAG, 13.0 kDa;  
 111 CT813-FLAG, 30.6 kDa; and 6xHis-VAMP3, 16.6 kDa using anti-FLAG and anti-6xHis

112 antibodies (Supplemental Table 2). The data shown are representative of three  
113 independent experiments.

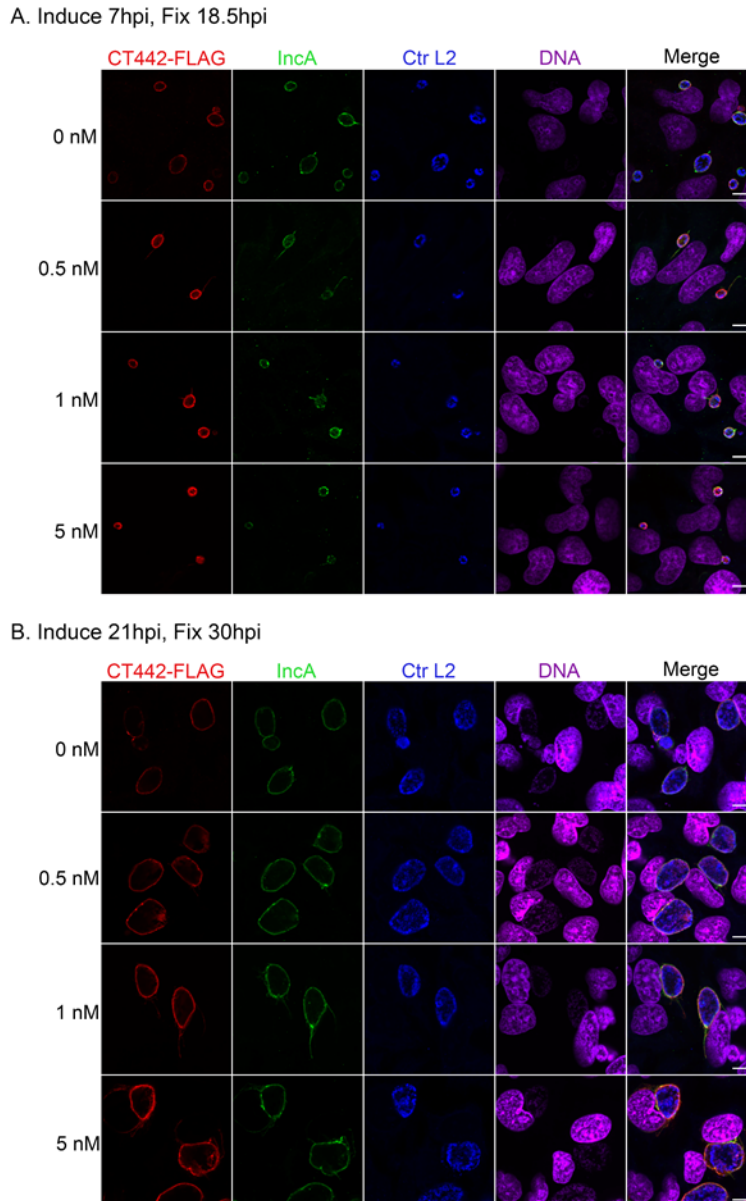

114

115 **Supplemental Figure 8. CT442-FLAG is localized within the inclusion membrane**  
 116 **and on fibers within the host cytosol.** HeLa cells seeded on glass coverslips were  
 117 infected with a transformed strain of Ctrl L2 that allows for inducible CT442-FLAG  
 118 expression using a MOI of 0.5. CT442-FLAG expression was induced at 7 hpi and fixed  
 119 at 18.5 hpi (A) or induced at 21 hpi and fixed at 30 hpi (B) using the indicated  
 120 concentrations of aTc. Samples were fixed for 5 min at room temperature in 100%

121 methanol and processed for indirect immunofluorescence using antibodies against  
122 FLAG/CT442-FLAG (red), endogenous IncA (green), Ctr L2 (blue), and DNA (purple),  
123 see Supplemental Table 2 for specific antibodies used. Images were taken on a Nikon  
124 Spinning Disk Confocal at 60x magnification and compiled in Photoshop v21.1. Scale  
125 bar = 10  $\mu$ m. A) When *ct442-flag* expression is induced at 7 hpi, CT442-FLAG localizes  
126 within the inclusion membrane. When *ct442-flag* expression is induced at 21 hpi (which  
127 is closer to the endogenous expression pattern of *ct442*), CT442-FLAG also localizes  
128 within the inclusion membrane. Thus, early expression of *ct442-flag* at 7 hpi does not  
129 alter its localization within the inclusion membrane.

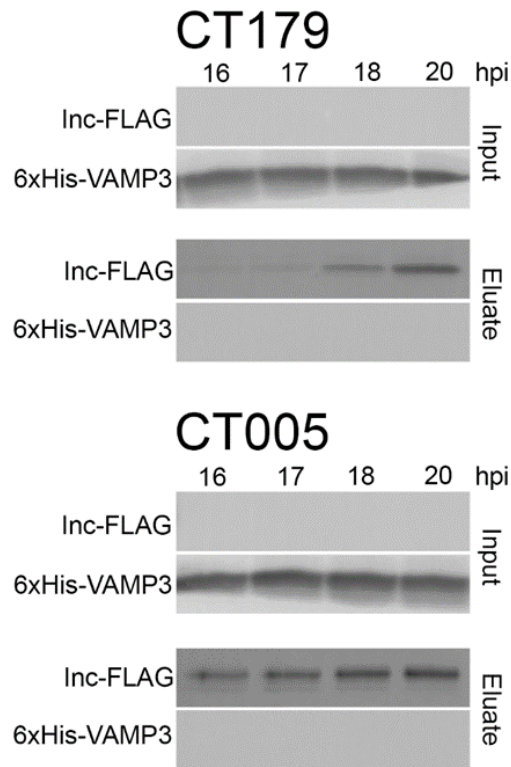

130

131 **Supplemental Figure 9. Biochemical examination of 6xHis-VAMP3 and Inc-FLAG**  
 132 **interactions.** Negative 6xHis-VAMP3 and Inc-FLAG interactions determined by  
 133 coimmunoprecipitation in chlamydial infected HeLa cells. HeLa cells seeded in a 6-well  
 134 plate were transfected with 6xHis-VAMP3, followed by infection with various Ctr L2  
 135 strains transformed with the indicated pBOMB4\_Inc-FLAG plasmids. Inc-FLAG  
 136 expression was induced with 5 nM aTc at 7 hpi (see Materials and Methods for specific  
 137 details). At indicated time points post-infection, cell lysates were collected, solubilized,  
 138 and FLAG-affinity purified using anti-FLAG magnetic beads. The input and eluate  
 139 fractions were immunoblotted for protein expression using antibodies against FLAG to  
 140 detect each Inc-FLAG protein and 6xHis to detect 6xHis-VAMP3 (Supplemental Table



141 2). Each Inc-FLAG protein was detected at its predicted molecular weight; CT179-  
142 FLAG, 24.0 kDa; CT005-FLAG, 40.6 kDa; and 6xHis-VAMP3, 16.6 kDa.

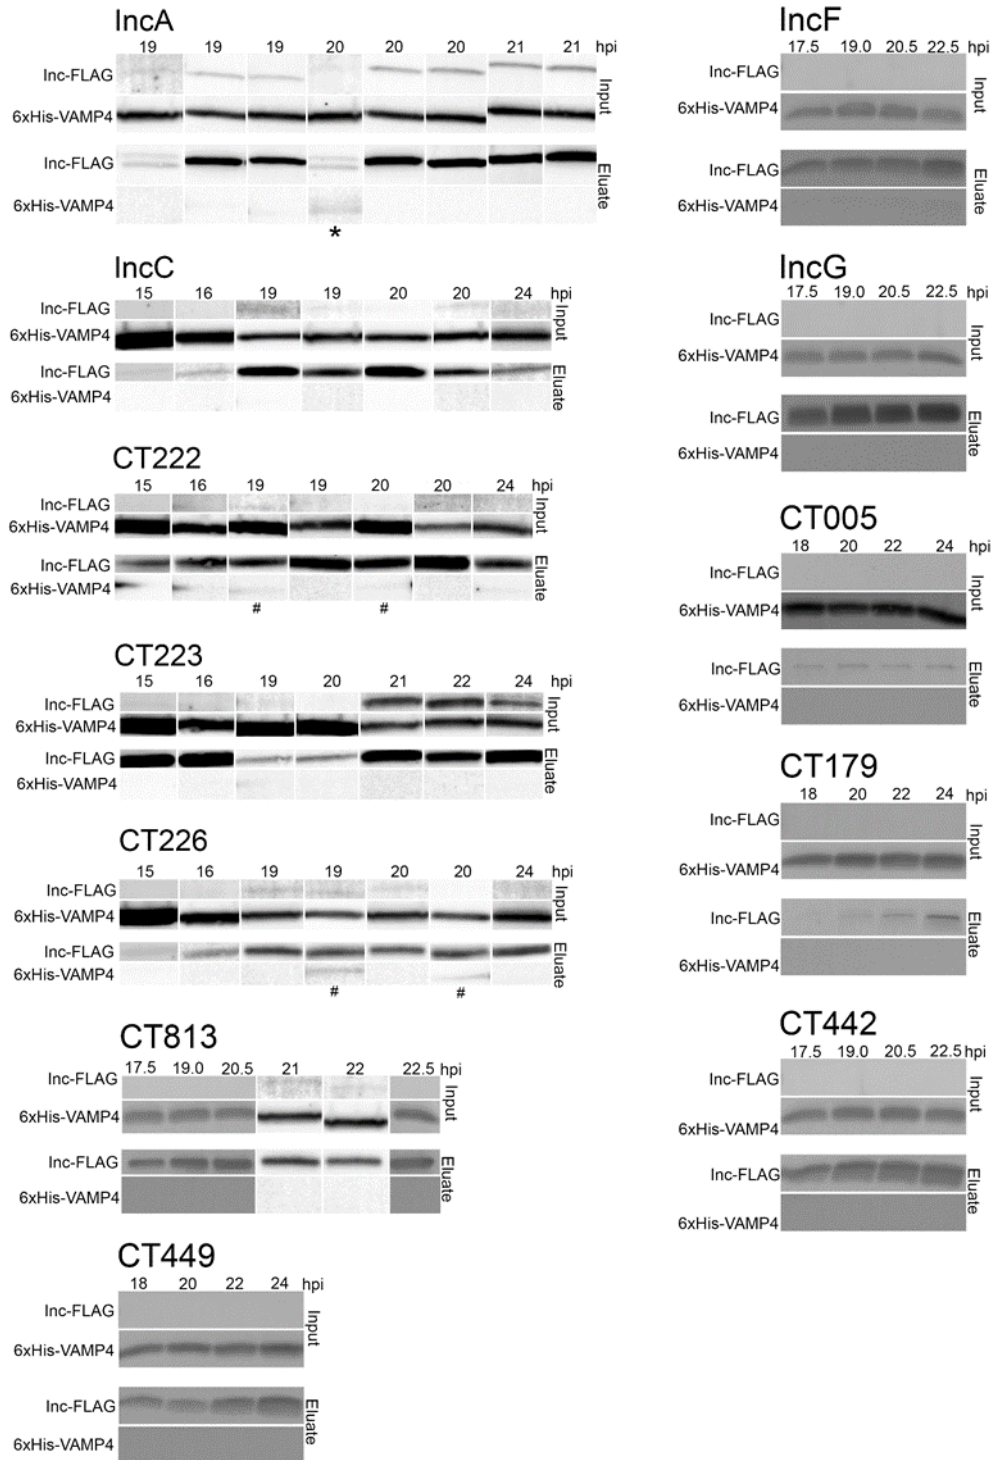

143

144 **Supplemental Figure 10. Biochemical examination of 6xHis-VAMP4 and Inc-FLAG**

145 **interactions.** Testing for coimmunoprecipitation of 6xHis-VAMP4 with specific Inc-

146 FLAG proteins in chlamydial infected HeLa cells. HeLa cells seeded in a 6-well plate or  
147 a 100 mm dish were transfected with 6xHis-VAMP4 followed by infection with  
148 transformed strains of Ctr L2 transformed with the indicated pBOMB4\_Inc-FLAG  
149 plasmid. Protein expression was induced at about 7 hpi with an appropriate  
150 concentration of aTc (1-5 nM, see Materials and Methods for specific details). At  
151 indicated time points post infection, the cell lysates were collected, solubilized, and  
152 affinity purified using anti-FLAG magnetic beads. The input and eluate fractions were  
153 immunoblotted to detect Inc-FLAG and 6xHis-VAMP4 proteins using FLAG and 6xHis  
154 antibodies (Supplemental Table 2). 6xHis-VAMP4 and specific Inc-FLAG proteins were  
155 detected at their predicted molecular weights: IncA-FLAG, 31.3 kDa; IncC-FLAG, 19.4  
156 kDa; IncF-FLAG, 11.3 kDa; IncG-FLAG, 18.4 kDa; CT005-FLAG, 40.6 kDa; CT179-  
157 FLAG, 24.0 kDa; CT222-FLAG, 14.9 kDa; CT223-FLAG, 30.4 kDa; CT226-FLAG, 19.9  
158 kDa; CT442-FLAG, 17.0 kDa; CT449-FLAG, 13.0 kDa; CT813-FLAG, 30.6 kDa; and  
159 6xHis-VAMP4, 19.6 kDa. The data shown are all independent experiments performed  
160 and organized by Inc and time point post-infection with some time points having multiple  
161 replicates. ‘\*’: True interaction; ‘#’: background bands due to antibody staining together.

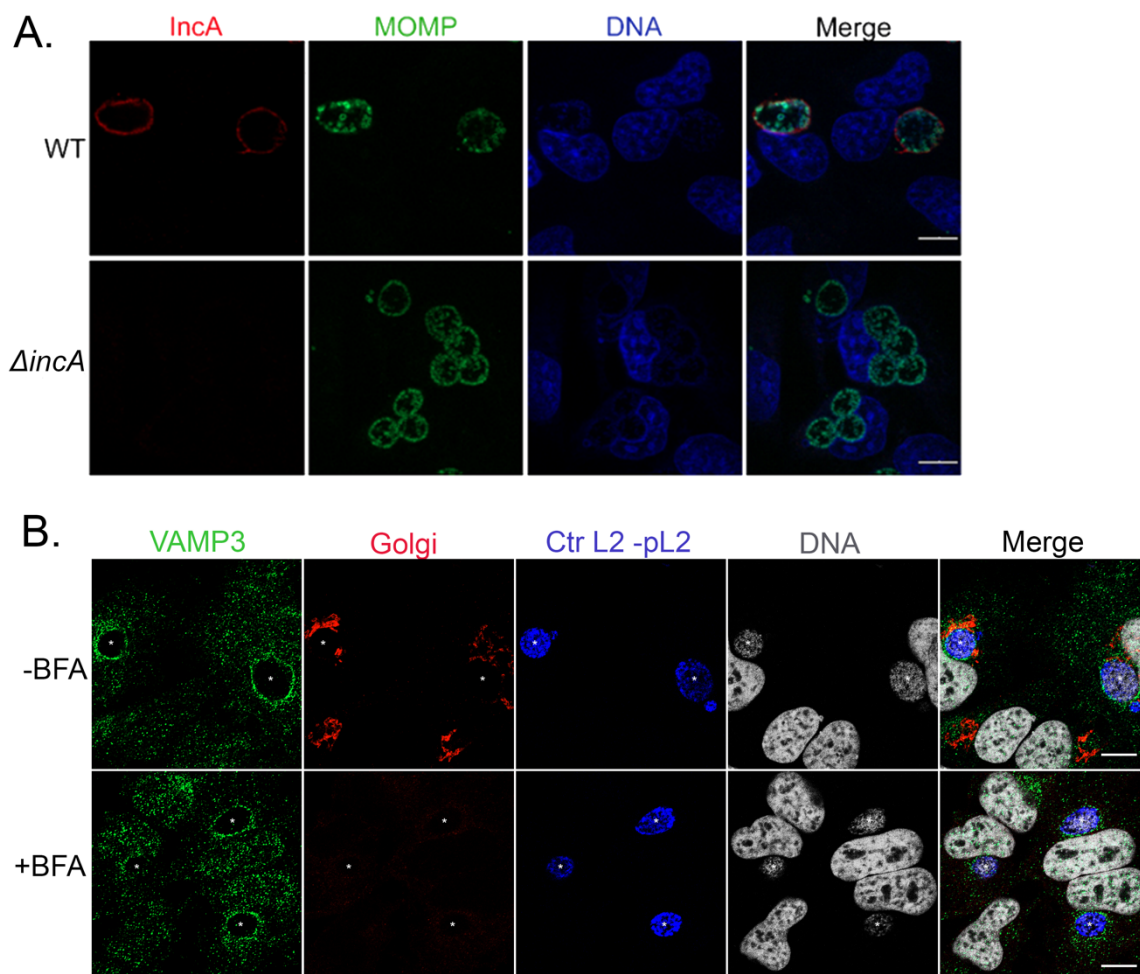

162

163 **Supplemental Figure 11. VAMP3 localization to Ctr L2 -pL2 inclusions is**  
 164 **unchanged compared to WT.** A) Confirmation of successful deletion of *incA* in Ct  
 165 serovar L2 via indirect immunofluorescence. HeLa cells were seeded on glass  
 166 coverslips in a 24-well plate and infected with WT Ct L2 or an *incA* deletion mutant  
 167 ( $\Delta incA$ ) for 25 hours. Then, cells were fixed and processed using antibodies against  
 168 IncA (red), chlamydial major outer membrane protein/MOMP (green), and DNA (blue).  
 169 Images were acquired with a Zeiss microscope with an Apotome at 100x. Scale bar =  
 170 10  $\mu$ m. Of note, the  $\Delta incA$  strain forms non-fusogenic inclusions and does not stain with

171 the endogenous IncA antibody, confirming the absence of IncA in the inclusion  
172 membrane and bacteria. B) HeLa cells seeded on glass coverslips in a 24-well plate  
173 were infected with a WT Ctr L2 that is cured of its endogenous plasmid pL2 (Ctr L2 -  
174 pL2). Two hours prior to fixation, infected cells were either treated or not with 1 µg/mL  
175 BFA to collapse the Golgi. After 30 hours of infection, coverslips were fixed in 4% PFA  
176 and permeabilized with 0.5% Triton X-100 then processed for indirect  
177 immunofluorescence to detect endogenous VAMP3 (green), Golgi (red), Ctr L2 (blue),  
178 and DNA (gray) (see Supplemental Table 2 for specific antibodies used). Images were  
179 acquired with a Zeiss LSM 800 Confocal at 63x magnification. Scale bar = 10 µm. White  
180 stars denote chlamydial inclusions. VAMP3 localization to inclusions during infection  
181 with Ctr L2 lacking its endogenous plasmid (-pL2) looks comparable to VAMP3  
182 localization during infection with WT Ctr L2 (Figure 1 & 5), indicating the increase in  
183 VAMP3 localization to Ctr L2 *ΔincA* inclusions (Figure 5) is not due to the lack of a  
184 plasmid in this strain.

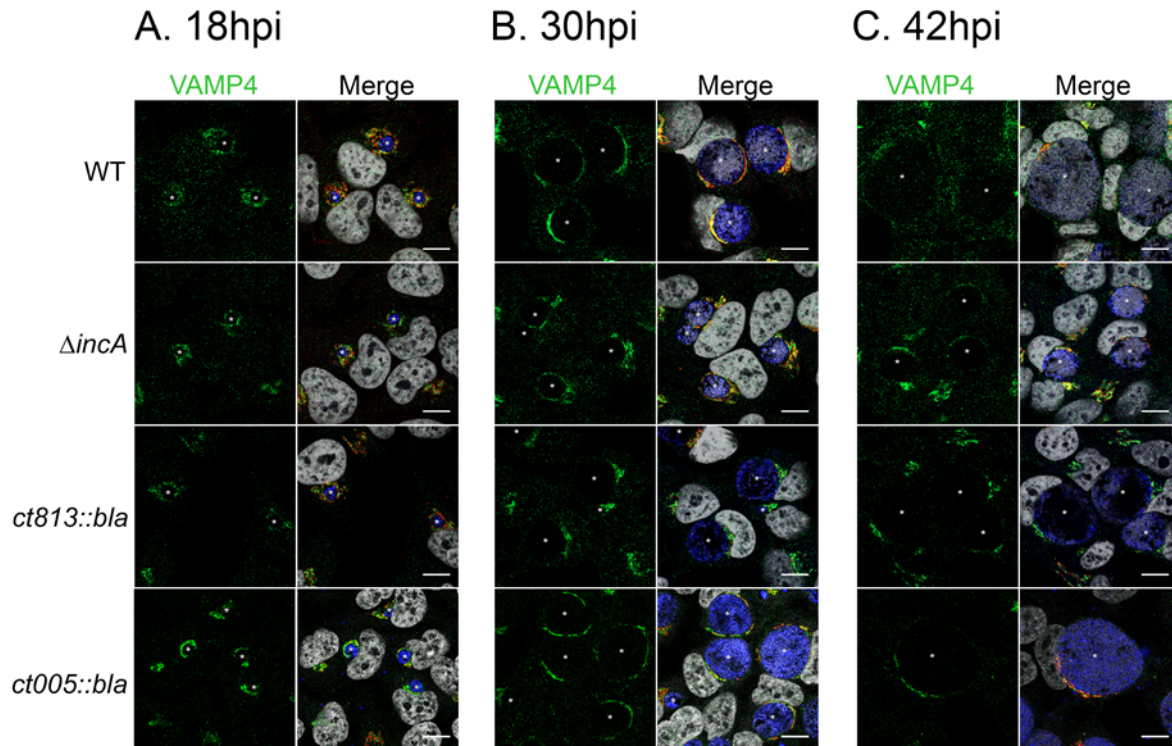

185

186 **Supplemental Figure 12. VAMP4 localization is unchanged during infection with**  
 187 **Ctr L2 *inc* mutant strains.** HeLa cells seeded on glass coverslips in a 24-well plate  
 188 were infected by centrifugation with either WT Ctr L2 or the indicated Ctr L2 *inc* mutant  
 189 strain (MOI of 0.5) for A) 18 hours, B) 30 hours, or C) or 42 hours. At the indicated times  
 190 post-infection, cells were fixed for 15 min at room temperature in 4% PFA and  
 191 permeabilized with 0.5% Triton X-100 for 5 min at room temperature. Fixed and  
 192 permeabilized cells were processed for indirect immunofluorescence to detect  
 193 endogenous VAMP4 (green), Golgi (red), *Chlamydia*/MOMP (blue), and DNA (gray)  
 194 (see Supplemental Table 2 for specific antibodies used). Images were taken on a Zeiss  
 195 LSM 800 Confocal at 63x magnification. White stars denote chlamydial inclusions.  
 196 Scale bar = 10  $\mu$ m. The localization of VAMP4 to inclusions looks indistinguishable  
 197 during infection with WT,  $\Delta incA$ , *ct813::bla*, and *ct005::bla* strains of Ctr L2 at A) 18 hpi,  
 198 B) 30 hpi, and C) 42 hpi.

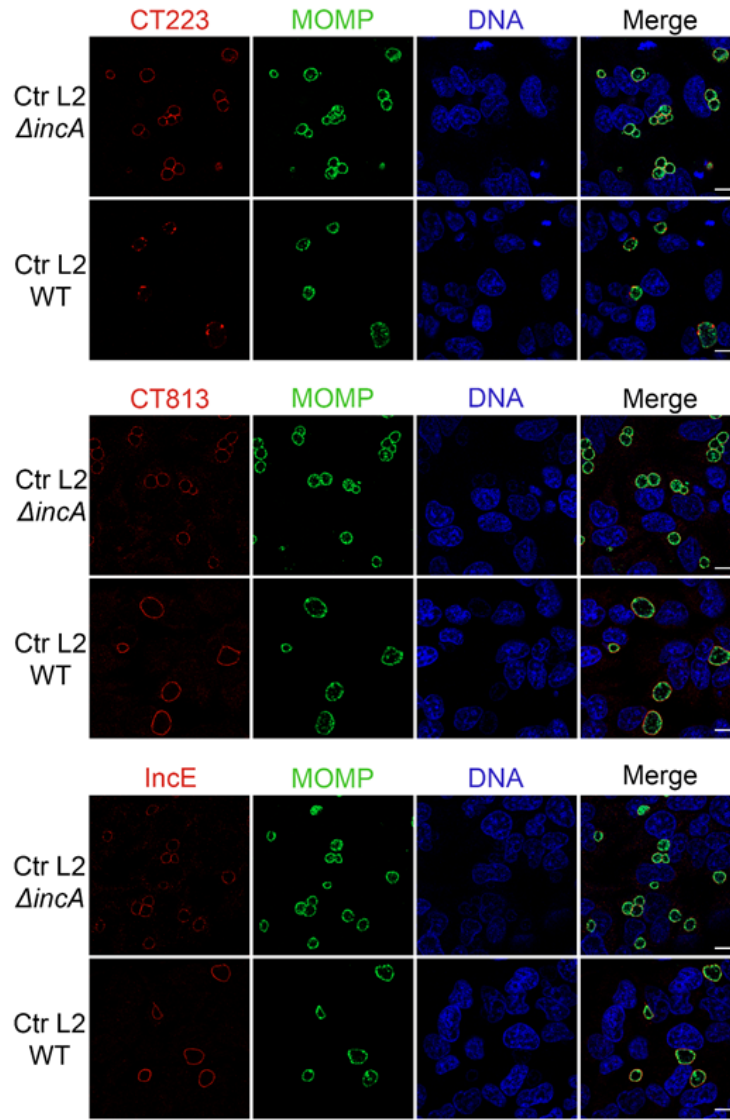

199

200 **Supplemental Figure 13. The inclusion membrane organization of endogenous**  
 201 **Inc protein CT223 is altered during infection with Ctr L2  $\Delta incA$ .** HeLa cells were  
 202 seeded in 24-well plates on glass coverslips and were allowed to grow overnight. Then,  
 203 cells were infected with either WT Ctr L2 or Ctr L2  $\Delta incA$  using an MOI of 0.5. At 24-25  
 204 hpi cells were fixed in 100% methanol for 5 min at room temperature then were  
 205 processed for indirect immunofluorescence for antibodies against each specific  
 206 endogenous Inc (red), chlamydial MOMP (green), and DNA (blue) (Supplemental Table



207 2). Inclusions in cells infected Ctr L2  $\Delta incA$  are non-fusogenic, as indicated by multiple  
208 inclusions in a single cell. Images were taken at 63x on a Confocal LSM 800 and  
209 compiled in Photoshop v21.1. Scale bar = 10  $\mu$ m. The organization of endogenous  
210 CT223 during infection with Ctr L2  $\Delta incA$  is more uniformly localized throughout the  
211 inclusion membrane, compared to its localization in microdomains during infection with  
212 WT Ctr L2, indicating that the organization of other endogenous Incs in the IM can be  
213 affected by the absence of an Inc protein. The organization of endogenous CT813 and  
214 IncE look the same during infection with both WT Ctr L2 and Ctr L2  $\Delta incA$ , indicating the  
215 absence of an Inc protein in the IM does not affect the organization of all other Inc  
216 proteins in the IM.

217
